# Supplementary material
Source: MDPI journal article supplement (https://www.mdpi.com/2072-6643/14/14/2987)
Supplement: s1 [file s1]

Archive with 2 entries (2 files):
- de Quadros et al_table S1_proof.pdf
- de Quadros et al_table S2_proof.pdf
