# Supplementary material for: Global Trends in the Availability of Dietary Data in Low and Middle-Income Countries
Source: MDPI journal article supplement (doi:10.3390/nu14142987), 2022-07-21
Supplement: s1 [file s1 › de Quadros et al_table S1_proof.pdf]

**Table S1.** List of dietary surveys conducted in LMICs and related details for geographic region, country income level, survey end year, survey decade, geographical coverage, type of area, and institutions responsible for data collection.

| Country        | Survey name                                                                                                                                           | Geographic region (FAO operational classification) | Country income level | Year (end) | Decade    | Geographical coverage of the data collection | Typology of the geographical area covered by the survey | Institution(s) responsible for data collection                                         |
|----------------|-------------------------------------------------------------------------------------------------------------------------------------------------------|----------------------------------------------------|----------------------|------------|-----------|----------------------------------------------|---------------------------------------------------------|----------------------------------------------------------------------------------------|
| Algeria        | Algeria - 2008/2010 - University of Tlemcen                                                                                                           | Near East & North Africa                           | LMC                  | 2010       | 2010-2019 | Sub-national                                 | Both rural and urban                                    | University of Tlemcen                                                                  |
| Algeria        | Algeria - 2010/2014 - University of Tlemcen                                                                                                           | Near East & North Africa                           | LMC                  | 2014       | 2010-2019 | Sub-national                                 | Both rural and urban                                    | University of Tlemcen                                                                  |
| Algeria        | Algeria - 2011/2012 - University of Tlemcen                                                                                                           | Near East & North Africa                           | LMC                  | 2012       | 2010-2019 | Sub-national                                 | Not specified                                           | University of Tlemcen                                                                  |
| American Samoa | American Samoa - 1990 - Hawaii Department of Health                                                                                                   | Asia & the Pacific                                 | UMC                  | 1990       | 1990-1999 | National                                     | Not specified                                           | Hawaii Department of Health                                                            |
| Argentina      | Argentina - 2015 - Latin American Study of Nutrition and Health / Estudio Latinoamericano de Nutrición y Salud (ELANS)                                | Latin America & Caribbean                          | UMC                  | 2015       | 2010-2019 | National                                     | Only urban                                              | International Life Sciences Institute, Argentina                                       |
| Argentina      | Argentina - 2005 - Encuesta Nacional de Nutrición y Salud (ENNyS)                                                                                     | Latin America & Caribbean                          | UMC                  | 2005       | 2000-2009 | National                                     | Both rural and urban                                    | Ministry of Health, Argentina                                                          |
| Argentina      | Argentina - 2012/2013 - Primer estudio sobre el estado nutricional y los hábitos alimentarios de la población adulta de Rosario                       | Latin America & Caribbean                          | UMC                  | 2013       | 2010-2019 | Sub-national                                 | Only urban                                              | Universidad del Centro Educativo Latinoamericano, Argentina                            |
| Argentina      | Argentina - 2019 - 2nd Encuesta Nacional de Nutrición y Salud (ENNyS 2)                                                                               | Latin America & Caribbean                          | UMC                  | 2019       | 2010-2019 | National                                     | Only urban                                              | Ministry of Health, Argentina                                                          |
| Argentina      | Primera Encuesta Alimentaria y Nutricional de la Ciudad Autónoma de Buenos Aires - EAN CABA                                                           | Latin America & Caribbean                          | UMC                  | 2011       | 2010-2019 | Sub-national                                 | Only urban                                              | Gobierno de la Ciudad de Buenos Aires                                                  |
| Bangladesh     | HarvestPlus Bangladesh Bio-fortified Rice Project - Baseline Dietary Survey                                                                           | Asia & the Pacific                                 | LMC                  | 2008       | 2000-2009 | Sub-national                                 | Only rural                                              | International Centre for Diarrhoeal Disease Research, Bangladesh (ICDDR,B)             |
| Bangladesh     | Bangladesh Integrated Household Survey (BIHS), 2011-2012                                                                                              | Asia & the Pacific                                 | LMC                  | 2012       | 2010-2019 | National                                     | Only rural                                              | Data Analysis and Technical Assistance (DATA) Limited supervised by IFPRI              |
| Bangladesh     | Bangladesh - 1996 - IFPRI                                                                                                                             | Asia & the Pacific                                 | LMC                  | 1996       | 1990-1999 | Sub-national                                 | Only rural                                              | International Food Policy Research Institute                                           |
| Bangladesh     | Aquatic food production systems (gher) across the saline gradients in the southwest coastal Bangladesh and its nexus to food and nutritional security | Asia & the Pacific                                 | LMC                  | 2014       | 2010-2019 | Sub-national                                 | Only rural                                              | Department of Fisheries and Marine Science, Noakhali Science and Technology University |
| Bangladesh     | Nutrition Survey of Bangladesh 2017-18                                                                                                                | Asia & the Pacific                                 | LMC                  | 2018       | 2010-2019 | National                                     | Both rural and urban                                    | Institute of Nutrition and Food Science, University of Dhaka                           |

|                                  |                                                                                                                     |                           |     |      |           |              |                      |                                                                                                                       |
|----------------------------------|---------------------------------------------------------------------------------------------------------------------|---------------------------|-----|------|-----------|--------------|----------------------|-----------------------------------------------------------------------------------------------------------------------|
| Benin                            | Benin - 2012 - Ghent University                                                                                     | Africa                    | LMC | 2012 | 2010-2019 | Sub-national | Only rural           | Ghent University and University of Abomey-Calavi                                                                      |
| Benin                            | Benin - FoodAfrica Project - Bioversity 2015                                                                        | Africa                    | LMC | 2014 | 2010-2019 | Sub-national | Not specified        | Bioversity International                                                                                              |
| Benin                            | Benin - 2014 - Regional Institute of Public Health (IRSP) of Ouidah                                                 | Africa                    | LMC | 2014 | 2010-2019 | Sub-national | Both rural and urban | Regional Institute of Public Health (IRSP) of Ouidah                                                                  |
| Benin                            | Benin - 2006 - TRANSNUT                                                                                             | Africa                    | LMC | 2006 | 2000-2009 | Sub-national | Both rural and urban | University of Montréal, Canada                                                                                        |
| Benin                            | Benin - 2007 - Ghent University                                                                                     | Africa                    | LMC | 2007 | 2000-2009 | Sub-national | Only urban           | Ghent University, Belgium; University of Abomey-Calavi, Benin; Prince Leopold Institute of Tropical Medicine, Belgium |
| Bolivia (Plurinational State of) | Bolivia - 2009/2012 - Lund University                                                                               | Latin America & Caribbean | LMC | 2012 | 2010-2019 | Sub-national | Only rural           | Lund University (Sweden) and San Simon University (Bolivia)                                                           |
| Brazil                           | Brazil - 2007 - ASBRAN                                                                                              | Latin America & Caribbean | UMC | 2007 | 2000-2009 | National     | Both rural and urban | Associação Brasileira de Nutrição - ASBRAN                                                                            |
| Brazil                           | Brazilian National Dietary Survey 2008-2009                                                                         | Latin America & Caribbean | UMC | 2009 | 2000-2009 | National     | Both rural and urban | Brazilian Institute of Geography and Statistics (Instituto Brasileiro de Geografia e Estatística - IBGE)              |
| Brazil                           | Brazil - 2015 - Latin American Study of Nutrition and Health / Estudio Latinoamericano de Nutrición y Salud (ELANS) | Latin America & Caribbean | UMC | 2015 | 2010-2019 | National     | Only urban           | Hospital Infantil Sabará                                                                                              |
| Brazil                           | Health Survey São Paulo (ISA-Capital) 2008                                                                          | Latin America & Caribbean | UMC | 2009 | 2000-2009 | Sub-national | Only urban           | University of São Paulo (USP)                                                                                         |
| Brazil                           | Health Survey of the State of São Paulo (ISA-SP) 2001/2002                                                          | Latin America & Caribbean | UMC | 2002 | 2000-2009 | Sub-national | Only urban           | University of São Paulo (USP), University of Campinas (UNICAMP), São Paulo State University (UNESP)                   |
| Brazil                           | Health Survey São Paulo (ISA-Capital) 2003                                                                          | Latin America & Caribbean | UMC | 2003 | 2000-2009 | Sub-national | Only urban           | University of São Paulo (USP)                                                                                         |
| Brazil                           | Brazilian Study of Cardiovascular Risks in Adolescents (ERICA)                                                      | Latin America & Caribbean | UMC | 2014 | 2010-2019 | National     | Both rural and urban | Federal University of Rio de Janeiro                                                                                  |
| Brazil                           | Brasilia consumption and physical activity survey - ICA Brasília                                                    | Latin America & Caribbean | UMC | 2017 | 2010-2019 | Sub-national | Both rural and urban | Universidade de Brasilia                                                                                              |
| Bulgaria                         | Bulgaria - 2004 - National Survey Of Food Intake And Nutritional Status (NSFIN)                                     | Europe & Central Asia     | UMC | 2004 | 2000-2009 | National     | Both rural and urban | National Center of Public Health and Analyses, Bulgaria                                                               |
| Bulgaria                         | Bulgaria - 2007 - Nutrition and Nutritional Status of Children under 5 years in Bulgaria (NUTRICHILD)               | Europe & Central Asia     | UMC | 2007 | 2000-2009 | National     | Both rural and urban | National Center of Public Health and Analyses, Bulgaria                                                               |

|              |                                                                                                                       |                           |     |      |           |              |                      |                                                                                                                                                   |
|--------------|-----------------------------------------------------------------------------------------------------------------------|---------------------------|-----|------|-----------|--------------|----------------------|---------------------------------------------------------------------------------------------------------------------------------------------------|
| Burkina Faso | Food consumption and iron status survey in two provinces of rural Burkina Faso                                        | Africa                    | LIC | 2010 | 2010-2019 | Sub-national | Only rural           | Institut de Recherche pour le Développement (IRD), and Institut de Recherche en Sciences de la Santé (IRSS)                                       |
| Burkina Faso | Burkina Faso - 2004 - Ghent University and Institute of Tropical Medicine of Antwerp, Belgium                         | Africa                    | LIC | 2004 | 2000-2009 | Sub-national | Only rural           | Ghent University and Institute of Tropical Medicine of Antwerp, Belgium                                                                           |
| Burkina Faso | Burkina Faso - 2010 - Université de Montréal                                                                          | Africa                    | LIC | 2010 | 2010-2019 | Sub-national | Only urban           | Institut de Recherche en Sciences de la Santé/Direction Régionale de l'Ouest (IRSS/DRO); Institut Supérieur des Sciences de la Population (ISSP)  |
| Burkina Faso | Burkina Faso - 2006 - IRD                                                                                             | Africa                    | LIC | 2006 | 2000-2009 | Sub-national | Only urban           | Institute of Research for Development (IRD)                                                                                                       |
| Burkina Faso | Burkina Faso - 2014 - Moderate Acute Malnutrition Out Study                                                           | Africa                    | LIC | 2014 | 2010-2019 | Sub-national | Only rural           | Action Against Hunger, Paris, France                                                                                                              |
| Cabo Verde   | Cabo Verde - 2014 - Universidade Nova de Lisboa                                                                       | Africa                    | LMC | 2014 | 2010-2019 | Sub-national | Only urban           | Universidade Nova de Lisboa, Portugal                                                                                                             |
| Cambodia     | Cambodia - 2010 - Institute of Technology of Cambodia                                                                 | Asia & the Pacific        | LMC | 2010 | 2010-2019 | Sub-national | Both rural and urban | Institute of Technology of Cambodia                                                                                                               |
| Cameroon     | Cameroon - 2012 - University of Douala                                                                                | Africa                    | LMC | 2012 | 2010-2019 | Sub-national | Only urban           | University of Douala                                                                                                                              |
| Cameroon     | Cameroon - 2006 - Umeå University                                                                                     | Africa                    | LMC | 2006 | 2000-2009 | Sub-national | Only urban           | Umeå University, Sweden                                                                                                                           |
| Cameroon     | Cameroon - 2013 - Ghent University                                                                                    | Africa                    | LMC | 2013 | 2010-2019 | Sub-national | Only rural           | Ghent University, Belgium                                                                                                                         |
| Cameroon     | Cameroon - 2009 - UC Davis/Hellen Keller International/Ministry of Public Health, Cameroon                            | Africa                    | LMC | 2009 | 2000-2009 | National     | Both rural and urban | MOH/Helen Keller Int'l/UC Davis                                                                                                                   |
| China        | China Health and Nutrition Survey (CHNS)                                                                              | Asia & the Pacific        | UMC | 2018 | 1980-2019 | National     | Both rural and urban | The University of North Carolina at Chapel Hill                                                                                                   |
| Colombia     | Colombia - 2015 - Latin American Study of Nutrition and Health / Estudio Latinoamericano de Nutrición y Salud (ELANS) | Latin America & Caribbean | UMC | 2015 | 2010-2019 | National     | Only urban           | Pontificia Universidad Javeriana                                                                                                                  |
| Colombia     | Colombia - 2005 - ProPAN                                                                                              | Latin America & Caribbean | UMC | 2005 | 2000-2009 | Sub-national | Both rural and urban | Unión Temporal Econometría S.A.                                                                                                                   |
| Colombia     | Colombia - 2015 - Encuesta Nacional de la Situación Nutricional (ENSIN)                                               | Latin America & Caribbean | UMC | 2016 | 2010-2019 | National     | Both rural and urban | Instituto Colombiano de Bienestar Familiar (ICBF), Ministerio de Salud y Protección Social (MSPS) and Instituto Nacional de Salud (INS), Colombia |
| Costa Rica   | Costa Rica - 1996 - INCIENSA                                                                                          | Latin America & Caribbean | UMC | 1996 | 1990-1999 | Sub-national | Both rural and urban | Costa Rican Institute for Research and Education on Nutrition and Health (INCIENSA), Ministry of Health                                           |

|                                  |                                                                                                                                                    |                           |     |      |           |              |                      |                                                                                                           |
|----------------------------------|----------------------------------------------------------------------------------------------------------------------------------------------------|---------------------------|-----|------|-----------|--------------|----------------------|-----------------------------------------------------------------------------------------------------------|
| Costa Rica                       | Costa Rica - 2006 - INCIENSA                                                                                                                       | Latin America & Caribbean | UMC | 2006 | 2000-2009 | Sub-national | Both rural and urban | Costa Rican Institute for Research and Education on Nutrition and Health (INCIENSA), Ministry of Health   |
| Costa Rica                       | Costa Rica - 1999/2000 - Encuesta Nacional de Nutrición - Comunidades centinela                                                                    | Latin America & Caribbean | UMC | 2000 | 2000-2009 | Sub-national | Both rural and urban | Ministero de Salud                                                                                        |
| Costa Rica                       | Costa Rica - 2015 - Latin American Study of Nutrition and Health / Estudio Latinoamericano de Nutrición y Salud (ELANS)                            | Latin America & Caribbean | UMC | 2015 | 2010-2019 | National     | Only urban           | University of Costa Rica                                                                                  |
| Costa Rica                       | Farm to School: a multicomponent food system intervention to increase consumption of Fruit and Vegetables in Costa Rica                            | Latin America & Caribbean | UMC | 2019 | 2010-2019 | Sub-national | Both rural and urban | Institute of Nutrition of Central America and Panama (INCAP)                                              |
| Côte d'Ivoire                    | Évaluation de la consommation alimentaire et de l'apport en nutriments des enfants de 6 à 12 ans et des femmes en âge de procréer en Côte d'Ivoire | Africa                    | LMC | 2021 | 2020-2029 | Sub-national | Only urban           | Société Ivoirienne de Nutrition (SIN)                                                                     |
| Democratic Republic of the Congo | Democratric Republic of Congo - 2009 - University of Kisangani/Ghent University                                                                    | Africa                    | LIC | 2009 | 2000-2009 | Sub-national | Both rural and urban | University of Kisangani and Ghent University                                                              |
| Democratic Republic of the Congo | Women First Dietary Recall Data: Sud-Ubangi, Democratic Republic of the Congo 2014/2016                                                            | Africa                    | LIC | 2016 | 2010-2019 | Sub-national | Only rural           | Kinshasa School of Public Health, Kinshasa, DRC                                                           |
| Dominica                         | Dominica - 2005/2006 - Clemson University                                                                                                          | Latin America & Caribbean | UMC | 2006 | 2000-2009 | Sub-national | Both rural and urban | Clemson University                                                                                        |
| Ecuador                          | Ecuador - 2002 - ProPAN                                                                                                                            | Latin America & Caribbean | UMC | 2003 | 2000-2009 | Sub-national | Both rural and urban | Pan American Health Organization                                                                          |
| Ecuador                          | Ecuador - 2015 - Latin American Study of Nutrition and Health / Estudio Latinoamericano de Nutrición y Salud (ELANS)                               | Latin America & Caribbean | UMC | 2015 | 2010-2019 | National     | Only urban           | Universidad San Francisco de Quito                                                                        |
| Ecuador                          | Ecuador - 2012 - Encuesta Nacional de Salud y Nutrición (ENSANUT-ECU)                                                                              | Latin America & Caribbean | UMC | 2013 | 2010-2019 | National     | Both rural and urban | Ministry of Health, Ecuador                                                                               |
| Egypt                            | Egypt - 1994 - Agriculture Research Centre (FTRI/ARC)                                                                                              | Near East & North Africa  | LMC | 1994 | 1990-1999 | National     | Both rural and urban | Food Technology Research Institute, Agriculture Research Centre (FTRI/ARC) of the Ministry of Agriculture |
| Egypt                            | Egypt - 1981 - National Nutrition Institute                                                                                                        | Near East & North Africa  | LMC | 1981 | 1980-1989 | National     | Both rural and urban | National Nutrition Institute                                                                              |
| Egypt                            | Egypt - 1998 - National Nutrition Institute                                                                                                        | Near East & North Africa  | LMC | 1998 | 1990-1999 | National     | Both rural and urban | National Nutrition Institute                                                                              |

|                   |                                                                                                                                                                      |                          |     |                                   |           |              |                      |                                                                                                    |
|-------------------|----------------------------------------------------------------------------------------------------------------------------------------------------------------------|--------------------------|-----|-----------------------------------|-----------|--------------|----------------------|----------------------------------------------------------------------------------------------------|
| Egypt             | Egypt - University of Maryland                                                                                                                                       | Near East & North Africa | LMC | <i>Not available</i> <sup>1</sup> | 2000-2009 | Sub-national | Both rural and urban | University of Maryland                                                                             |
| Equatorial Guinea | Equatorial Guinea - 1997 - Instituto de Salud Carlos III                                                                                                             | Africa                   | UMC | 1997                              | 1990-1999 | National     | Both rural and urban | Instituto de Salud Carlos III                                                                      |
| Equatorial Guinea | Equatorial Guinea - 2004 - Instituto de Salud Carlos III                                                                                                             | Africa                   | UMC | 2004                              | 2000-2009 | National     | Both rural and urban | Instituto de Salud Carlos III                                                                      |
| Ethiopia          | Ethiopia - 2011 - Ethiopian Public Health Institute (EPHI)                                                                                                           | Africa                   | LIC | 2011                              | 2010-2019 | National     | Both rural and urban | Ethiopian Public Health Institute (EPHI)                                                           |
| Ethiopia          | Ethiopia - 2009 - Instituto de Salud Carlos III                                                                                                                      | Africa                   | LIC | 2009                              | 2000-2009 | Sub-national | Both rural and urban | Instituto de Salud Carlos III                                                                      |
| Ethiopia          | Ethiopia - 2005 - University of Gondar                                                                                                                               | Africa                   | LIC | 2005                              | 2000-2009 | Sub-national | Only urban           | University of Gondar                                                                               |
| Ethiopia          | Dietary Practices, Maternal Nutritional Status and Child Stunting: Comparative and Intervention Studies in Pulse and Non-pulse Growing Rural Communities in Ethiopia | Africa                   | LIC | 2013                              | 2010-2019 | Sub-national | Only rural           | University of Saskatchewan, Canada                                                                 |
| Ethiopia          | Ethiopia - 2009/2010 - Jimma University                                                                                                                              | Africa                   | LIC | 2010                              | 2010-2019 | Sub-national | Both rural and urban | Jimma University, Ethiopia and Ghent University, Belgium                                           |
| Ethiopia          | Ethiopia - 2013/2014 - Addis Ababa University                                                                                                                        | Africa                   | LIC | 2014                              | 2010-2019 | Sub-national | Only rural           | Addis Ababa University, Ethiopia                                                                   |
| Ethiopia          | Dietary behavior, food and nutrient intake of pregnant and non-pregnant women of Southern Ethiopia                                                                   | Africa                   | LIC | 2013                              | 2010-2019 | Sub-national | Only rural           | Addis Ababa Science and Technology University, Ethiopia                                            |
| Ethiopia          | Ethiopia - 2014 - University of Saskatchewan                                                                                                                         | Africa                   | LIC | 2014                              | 2010-2019 | Sub-national | Only rural           | University of Saskatchewan, Canada; Haramaya University, Ethiopia and Hawassa University, Ethiopia |
| Fiji              | Fiji - 1980 - Cardiovascular and Metabolic Disease Survey                                                                                                            | Asia & the Pacific       | UMC | 1980                              | 1980-1989 | Sub-national | Both rural and urban | Royal Southern Memorial Hospital (Fiji) and the Royal Melbourne Hospital                           |
| Fiji              | Fiji - 1996 - Japan Women's University                                                                                                                               | Asia & the Pacific       | UMC | 1996                              | 1990-1999 | Sub-national | Only urban           | Japan Women's University                                                                           |
| Fiji              | Fiji - 2004 - National Nutrition Survey                                                                                                                              | Asia & the Pacific       | UMC | 2004                              | 2000-2009 | National     | Both rural and urban | National Food and Nutrition Centre                                                                 |
| Fiji              | Fiji - 2010 - Impact Study on Iron Fortified Flour                                                                                                                   | Asia & the Pacific       | UMC | 2010                              | 2010-2019 | National     | Both rural and urban | National Food and Nutrition Centre                                                                 |
| Fiji              | Fiji - 2015 - National Nutrition Survey                                                                                                                              | Asia & the Pacific       | UMC | 2015                              | 2010-2019 | National     | Both rural and urban | National Food and Nutrition Centre                                                                 |
| Ghana             | Ghana - 2007 - University of Ghana                                                                                                                                   | Africa                   | LMC | 2007                              | 2000-2009 | Sub-national | Not specified        | University of Ghana                                                                                |
| Ghana             | Ghana - 2010/2011 - Modeling the Epidemiologic Transition Study (METS)                                                                                               | Africa                   | LMC | 2011                              | 2010-2019 | Sub-national | Only rural           | Loyola University Chicago, IL, USA                                                                 |
| Ghana             | Effect of lysine supplementation on health and morbidity in subjects belonging to poor peri-urban households in Accra, Ghana                                         | Africa                   | LMC | 2008                              | 2000-2009 | Sub-national | Both rural and urban | Department of Nutrition and Food Science, University of Ghana                                      |

<sup>1</sup> For surveys with missing information for end year, the decade was imputed based on the documentation publication date.

|           |                                                                                                                                                                                                                                    |                           |     |      |           |              |                      |                                                                                                                              |
|-----------|------------------------------------------------------------------------------------------------------------------------------------------------------------------------------------------------------------------------------------|---------------------------|-----|------|-----------|--------------|----------------------|------------------------------------------------------------------------------------------------------------------------------|
| Ghana     | TenTwenty: Ghana Dietary Intake Among Adolescent Girls in North-Eastern Ghana                                                                                                                                                      | Africa                    | LMC | 2019 | 2010-2019 | Sub-national | Both rural and urban | University for Development Studies                                                                                           |
| Ghana     | Community assessment course of the Department of Nutrition and Food Science, University of Ghana                                                                                                                                   | Africa                    | LMC | 2021 | 2020-2029 | Sub-national | Both rural and urban | University of Ghana                                                                                                          |
| Guatemala | Guatemala - 2012 - FANTA/INCAP                                                                                                                                                                                                     | Latin America & Caribbean | UMC | 2012 | 2010-2019 | Sub-national | Only rural           | Food and Nutrition Technical Assistance III Project (FANTA) and Institute of Nutrition of Central America and Panama (INCAP) |
| Guatemala | Women First Dietary Recall Data: Chimaltenango, Guatemala 2014/2016                                                                                                                                                                | Latin America & Caribbean | UMC | 2016 | 2010-2019 | Sub-national | Only rural           | INCAP (Instituto de Nutrición de Centro América y Panamá), Guatemala City, Guatemala                                         |
| Guatemala | Validation study (FFQ against R24H)                                                                                                                                                                                                | Latin America & Caribbean | UMC | 2009 | 2000-2009 | Sub-national | Both rural and urban | Institute of Nutrition of Central America and Panama (INCAP)                                                                 |
| Guatemala | Guatemala - 1996-1999 - Generational Effects Study, INCAP                                                                                                                                                                          | Latin America & Caribbean | UMC | 1999 | 1990-1999 | Sub-national | Only rural           | Institute of Nutrition of Central America and Panama (INCAP)                                                                 |
| Guatemala | Controlling study of the impact of the biofortified bean variety SMN39 (Phaseolus vulgaris L.) associated with agricultural and nutritional education, to prevent iron deficiency in rural adolescent women from Eastern Guatemala | Latin America & Caribbean | UMC | 2016 | 2010-2019 | Sub-national | Both rural and urban | Institute of Nutrition of Central America and Panama (INCAP)                                                                 |
| Guatemala | Farm to School: a multicomponent food system intervention to increase consumption of Fruit and Vegetables in Guatemala                                                                                                             | Latin America & Caribbean | UMC | 2018 | 2010-2019 | Sub-national | Both rural and urban | Institute of Nutrition of Central America and Panama (INCAP)                                                                 |
| Honduras  | Honduras - 2008/2010 - University of North Carolina                                                                                                                                                                                | Latin America & Caribbean | LMC | 2010 | 2010-2019 | Sub-national | Both rural and urban | University of North Carolina                                                                                                 |
| India     | India - 2009/2012 - Diet and Nutritional status of Rural population, Prevalence of hypertension and Diabetes among Adults and Infant & Young child feeding practices                                                               | Asia & the Pacific        | LMC | 2012 | 2010-2019 | National     | Only rural           | Indian Council of Medical Research (ICMR), National Institute of Nutrition, Hyderabad, India                                 |
| India     | Women First Dietary Recall Data: Belagavi, Karnataka, India 2014/2016                                                                                                                                                              | Asia & the Pacific        | LMC | 2015 | 2010-2019 | Sub-national | Only rural           | KLE University's Jawaharlal Nehru Medical College, Belagavi, Karnataka, India                                                |
| India     | India - 2013/2014 - All India Institute of Medical Sciences                                                                                                                                                                        | Asia & the Pacific        | LMC | 2014 | 2010-2019 | Sub-national | Only rural           | All India Institute of Medical Sciences, New Delhi, India                                                                    |
| India     | India - 1994/1996 - Pune Maternal Nutrition Study                                                                                                                                                                                  | Asia & the Pacific        | LMC | 1996 | 1990-1999 | Sub-national | Only rural           | King Edward Memorial Hospital, Pune, India                                                                                   |

|           |                                                                                                                                                  |                          |     |      |           |              |                      |                                                                                                                     |
|-----------|--------------------------------------------------------------------------------------------------------------------------------------------------|--------------------------|-----|------|-----------|--------------|----------------------|---------------------------------------------------------------------------------------------------------------------|
| India     | India - 2013/2014 - Hirabai Cowasji Jehangir Medical Research Institute                                                                          | Asia & the Pacific       | LMC | 2014 | 2010-2019 | Sub-national | Only urban           | Hirabai Cowasji Jehangir Medical Research Institute, India                                                          |
| India     | India - 2006-2010 - Hirabai Cowasji Jehangir Medical Research Institute                                                                          | Asia & the Pacific       | LMC | 2010 | 2010-2019 | Sub-national | Only urban           | Hirabai Cowasji Jehangir Medical Research Institute, India                                                          |
| India     | SPANDAN Bihar-Odisha Integrated Ag-Nutrition Survey, India, 2014/2015                                                                            | Asia & the Pacific       | LMC | 2015 | 2010-2019 | Sub-national | Only rural           | Indira Gandhi Institute of Development Research (IGIDR); National Institute of Nutrition (NIN)                      |
| India     | A study of growth, nutrition and health status of urban and rural school children and adolescents with special reference to vitamin D deficiency | Asia & the Pacific       | LMC | 2017 | 2010-2019 | National     | Both rural and urban | Hirabai Cowasji Jehangir Medical Research Institute                                                                 |
| India     | Chennai Urban Rural Epidemiological Study (CURES)                                                                                                | Asia & the Pacific       | LMC | 2013 | 2010-2019 | Sub-national | Both rural and urban | MADRAS DIABETES RESEARCH FOUNDATION                                                                                 |
| India     | Developing a national salt reduction program for India: population survey in North and South India                                               | Asia & the Pacific       | LMC | 2014 | 2010-2019 | Sub-national | Both rural and urban | George Institute for Global Health, India                                                                           |
| Indonesia | Indonesia - 2011 - SEANUTS                                                                                                                       | Asia & the Pacific       | LMC | 2011 | 2010-2019 | National     | Both rural and urban | FrieslandCampina                                                                                                    |
| Indonesia | Food Consumption Survey (FCS) Indonesia 2014                                                                                                     | Asia & the Pacific       | LMC | 2014 | 2010-2019 | National     | Both rural and urban | National Institute of Health Research and Development, Ministry of Health                                           |
| Indonesia | Indonesia - 2003/2004 - The University of Tokyo                                                                                                  | Asia & the Pacific       | LMC | 2004 | 2000-2009 | Sub-national | Only rural           | The University of Tokyo, Japan; Bogor Agricultural University, Indonesia; and Japan Wildlife Research Center, Japan |
| Indonesia | Indonesia - 2016 - Developing Biomarkers of Exclusive Breastfeeding Practice - HBGD                                                              | Asia & the Pacific       | LMC | 2016 | 2010-2019 | Sub-national | Only rural           | Nutrition Working Group, Faculty of Medicine Universitas Padjadjaran                                                |
| Iraq      | Iraq - 1998/2000 - College of Medicine and Health Technology                                                                                     | Near East & North Africa | UMC | 2000 | 2000-2009 | Sub-national | Only urban           | College of Medicine and Health Technology, Bab Al-Mudum, Baghdad                                                    |
| Kenya     | Kenya - 2012 - London School of Hygiene/Kenyatta University                                                                                      | Africa                   | LMC | 2012 | 2010-2019 | Sub-national | Only rural           | London School of Hygiene and Tropical Medicine, Kenyatta University, Consultant Halendorf, Nutridemics              |
| Kenya     | Kenya National Micronutrient Survey 2011                                                                                                         | Africa                   | LMC | 2011 | 2010-2019 | National     | Both rural and urban | Kenya Medical Research Institute (KEMRI)                                                                            |
| Kenya     | Kenya - 2012 - Bioversity INULA                                                                                                                  | Africa                   | LMC | 2012 | 2010-2019 | Sub-national | Both rural and urban | Institute of Nutritional Sciences - University of Giessen                                                           |
| Kenya     | Kenya - 2009/2010 - Jomo Kenyatta University of Agriculture and Technology                                                                       | Africa                   | LMC | 2010 | 2010-2019 | Sub-national | Not specified        | Jomo Kenyatta University of Agriculture and Technology                                                              |

|          |                                                                                                                                                                            |                    |     |                                   |           |              |                      |                                                                                                                   |
|----------|----------------------------------------------------------------------------------------------------------------------------------------------------------------------------|--------------------|-----|-----------------------------------|-----------|--------------|----------------------|-------------------------------------------------------------------------------------------------------------------|
| Kenya    | Kenya - 2007/2008 - Wageningen University                                                                                                                                  | Africa             | LMC | 2008                              | 2000-2009 | Sub-national | Only rural           | Wageningen University, Netherlands                                                                                |
| Kenya    | Kenya - 2001/2002 - University of Bologna                                                                                                                                  | Africa             | LMC | 2002                              | 2000-2009 | Sub-national | Only rural           | University of Bologna, Italy                                                                                      |
| Kenya    | Kenya - 1998 - Child Nutrition Project (CNP)                                                                                                                               | Africa             | LMC | 1998                              | 1990-1999 | Sub-national | Only rural           | George Mason University, USA; University of California, Los Angeles, USA; University of Hawaii Cancer Center, USA |
| Kenya    | Kenya - University of Cape Town                                                                                                                                            | Africa             | LMC | <i>Not available</i> <sup>2</sup> | 2010-2019 | Sub-national | Only rural           | University of Cape Town, South Africa; Kenya Technical Teachers College, Kenya; Kenyatta University, Kenya        |
| Kenya    | Kenya - 2009 - Washington University School of Medicine                                                                                                                    | Africa             | LMC | 2009                              | 2000-2009 | Sub-national | Only rural           | Washington University School of Medicine, USA; Kenya Agricultural Research Institute, Kenya                       |
| Kenya    | Kenya - 2018 - Improving access to and benefits from a wealth of diverse seeds to support on-farm biodiversity for healthy people in resilient landscapes: Baseline Survey | Africa             | LMC | 2018                              | 2010-2019 | Sub-national | Only rural           | Bioversity International                                                                                          |
| Kenya    | Kenya - 2014 - Plenty season - Humid Tropics Agrobiodiversity and Nutrition Project                                                                                        | Africa             | LMC | 2014                              | 2010-2019 | Sub-national | Only rural           | Alliance of Bioversity International & CIAT                                                                       |
| Kenya    | Kenya - 2015 - Lean Season - Humid Tropics Agrobiodiversity and Nutrition Project                                                                                          | Africa             | LMC | 2015                              | 2010-2019 | Sub-national | Only rural           | Alliance of Bioversity International & CIAT                                                                       |
| Kenya    | Kenya - 2015 - Baseline - Humid Tropics Agrobiodiversity and Nutrition Project                                                                                             | Africa             | LMC | 2015                              | 2010-2019 | Sub-national | Only rural           | Alliance of Bioversity International & CIAT                                                                       |
| Kenya    | Kenya - 2016: Innovative, participatory tools for dietary assessment and nutrition education in Turkana County – Diagnostic survey                                         | Africa             | LMC | 2016                              | 2010-2019 | Sub-national | Only rural           | Alliance of Bioversity International and the International Center for Tropical Agriculture (CIAT)                 |
| Kenya    | Maternal detailed dietary data collected from post-partum women in rural Kenya under the WASH Benefits Clinical Trial                                                      | Africa             | LMC | 2014                              | 2010-2019 | Sub-national | Only rural           | Innovations for Poverty Action - Kenya                                                                            |
| Kenya    | Contribution of locally processed fruits and vegetables towards sustainable nutrition in East Africa: studies from Kenya, Tanzania and Uganda                              | Africa             | LMC | 2019                              | 2010-2019 | Sub-national | Only rural           | Makerere University and University of Goettingen                                                                  |
| Kiribati | Kiribati - 1981 - Kiribati Diabetes and Cardiovascular Disease Survey                                                                                                      | Asia & the Pacific | LMC | 1981                              | 1980-1989 | Sub-national | Both rural and urban | Ministry for Health and Community Affairs,                                                                        |

<sup>2</sup> For surveys with missing information for end year, the decade was imputed based on the documentation publication date.

|                                  |                                                                                            |                          |     |      |           |              |                      |                                                                                   |
|----------------------------------|--------------------------------------------------------------------------------------------|--------------------------|-----|------|-----------|--------------|----------------------|-----------------------------------------------------------------------------------|
|                                  |                                                                                            |                          |     |      |           |              |                      | Kiribati and Royal Southern Memorial Hospital                                     |
| Lao People's Democratic Republic | National Food Consumption Survey Lao PDR 2016-2017                                         | Asia & the Pacific       | LMC | 2017 | 2010-2019 | National     | Both rural and urban | Mahidol University, Thailand                                                      |
| Lao People's Democratic Republic | Lao's People Democratic Republic - 2005 - Institut Francophone pour la Médecine Tropicale  | Asia & the Pacific       | LMC | 2005 | 2000-2009 | Sub-national | Only rural           | Institut Francophone pour la Médecine Tropicale                                   |
| Lebanon                          | Early Life Nutrition and Health in Lebanon                                                 | Near East & North Africa | UMC | 2012 | 2010-2019 | National     | Both rural and urban | American University of Beirut                                                     |
| Lebanon                          | Lebanon - 2005/2006 - American University of Beirut                                        | Near East & North Africa | UMC | 2006 | 2000-2009 | Sub-national | Only urban           | American University of Beirut; University of Leicester                            |
| Lebanon                          | Lebanon - 1997/1998 - American University of Beirut                                        | Near East & North Africa | UMC | 1998 | 1990-1999 | National     | Both rural and urban | American University of Beirut                                                     |
| Lebanon                          | Lebanon - 1997 - American University of Beirut                                             | Near East & North Africa | UMC | 1997 | 1990-1999 | National     | Both rural and urban | American University of Beirut                                                     |
| Lebanon                          | Lebanon - 2003 - American University of Beirut                                             | Near East & North Africa | UMC | 2003 | 2000-2009 | National     | Not specified        | American University of Beirut                                                     |
| Lebanon                          | Nutrition and Non-communicable Diseases Risk Factor                                        | Near East & North Africa | UMC | 2009 | 2000-2009 | National     | Both rural and urban | American University of Beirut                                                     |
| Lebanon                          | Lebanon - 2011/2012 - American University of Beirut                                        | Near East & North Africa | UMC | 2012 | 2010-2019 | Sub-national | Only urban           | American University of Beirut                                                     |
| Lebanon                          | Lebanon - 2015 - Saint-Joseph University of Beirut                                         | Near East & North Africa | UMC | 2015 | 2010-2019 | Sub-national | Only urban           | Saint-Joseph University of Beirut                                                 |
| Lesotho                          | Lesotho - 2010 - University of the Free State                                              | Africa                   | LMC | 2010 | 2010-2019 | Sub-national | Only urban           | University of the Free State, South Africa                                        |
| Libya                            | Libya - 2008 - Newcastle University                                                        | Near East & North Africa | UMC | 2008 | 2000-2009 | Sub-national | Only urban           | Newcastle University                                                              |
| Libya                            | Libya - 2005/2007 - University of Giessen                                                  | Near East & North Africa | UMC | 2007 | 2000-2009 | Sub-national | Both rural and urban | University of Giessen                                                             |
| Madagascar                       | NutriMad project                                                                           | Africa                   | LIC | 2004 | 2000-2009 | Sub-national | Only urban           | GRET, IRD and the University of Antananarivo                                      |
| Malawi                           | Malawi - 2010 - DOSE trial                                                                 | Africa                   | LIC | 2010 | 2010-2019 | Sub-national | Only rural           | University of Helsinki                                                            |
| Malawi                           | Malawi - 1998 - University of Otago                                                        | Africa                   | LIC | 1998 | 1990-1999 | Sub-national | Only rural           | University of Otago                                                               |
| Malawi                           | Malawi - 2008 - Lilongwe University of Agriculture & Natural Resources                     | Africa                   | LIC | 2008 | 2000-2009 | Sub-national | Only rural           | Lilongwe University of Agriculture & Natural Resources, Malawi                    |
| Malaysia                         | Malaysia - 2014 - Ministry of Health Malaysia                                              | Asia & the Pacific       | UMC | 2014 | 2010-2019 | National     | Both rural and urban | Ministry of Health Malaysia                                                       |
| Malaysia                         | Malaysia Lipid Study 2012/2013                                                             | Asia & the Pacific       | UMC | 2013 | 2010-2019 | Sub-national | Only urban           | Malaysian Palm Oil Council                                                        |
| Maldives                         | Maldives - 1997/1998 - University of Hohenheim                                             | Asia & the Pacific       | UMC | 1998 | 1990-1999 | Sub-national | Both rural and urban | Institute of Biological Chemistry and Nutrition, University of Hohenheim          |
| Mali                             | Mali - 2007 - University of Abomey Calavi/Wageningen University/Institute of Rural Economy | Africa                   | LIC | 2007 | 2000-2009 | Sub-national | Only urban           | University of Abomey Calavi, Wageningen University and Institute of Rural Economy |

|                  |                                                                                                                                                                                                                               |                           |     |                                   |           |              |                      |                                                                                                |
|------------------|-------------------------------------------------------------------------------------------------------------------------------------------------------------------------------------------------------------------------------|---------------------------|-----|-----------------------------------|-----------|--------------|----------------------|------------------------------------------------------------------------------------------------|
| Marshall Islands | Marshall Islands - 2007 - John Hopkins University                                                                                                                                                                             | Asia & the Pacific        | UMC | 2007                              | 2000-2009 | Sub-national | Both rural and urban | Johns Hopkins University, Bloomberg School of Public Health                                    |
| Mexico           | Mexican National Health and Nutrition Survey 2012                                                                                                                                                                             | Latin America & Caribbean | UMC | 2012                              | 2010-2019 | National     | Both rural and urban | National Public Health Institute, Mexico                                                       |
| Mexico           | Halfway National Health and Nutrition Survey 2016 (ENSANUT MC 2016)                                                                                                                                                           | Latin America & Caribbean | UMC | 2016                              | 2010-2019 | National     | Both rural and urban | National Institute of Public Health, Mexico                                                    |
| Montenegro       | European Food Safety Authority programme with the subject “Support to National Dietary Surveys in Compliance with the EU Menu methodology (sixth support) - “The adults’ survey”, including subjects from 10 to 74 years old“ | Europe & Central Asia     | UMC | 2021                              | 2020-2029 | National     | Both rural and urban | Faculty for Food Technology, Food Safety and Ecology, University of Donja Gorica (UDG).        |
| Mozambique       | Estudo do Estado Nutricional e da Dieta em Raparigas Adolescentes na Zambézia (ZANE)                                                                                                                                          | Africa                    | LIC | 2010                              | 2010-2019 | Sub-national | Both rural and urban | University of Helsinki, Finland                                                                |
| Mozambique       | Mozambique - 2006 - HarvestPlus                                                                                                                                                                                               | Africa                    | LIC | 2006                              | 2000-2009 | Sub-national | Only rural           | International Food Policy Research Institute (IFPRI) and collaborators                         |
| Mozambique       | Towards Sustainable Nutrition Improvement in Rural Mozambique (TSNI) - Baseline survey                                                                                                                                        | Africa                    | LIC | 2003                              | 2000-2009 | Sub-national | Only rural           | Michigan State University                                                                      |
| Myanmar          | Myanmar - 2003/2005 - Department of Medical Research (Lower Myanmar)                                                                                                                                                          | Asia & the Pacific        | LMC | 2005                              | 2000-2009 | Sub-national | Both rural and urban | Department of Medical Research (Lower Myanmar)                                                 |
| Nepal            | Nepal - 2008/2009 - University of Bergen                                                                                                                                                                                      | Asia & the Pacific        | LMC | 2009                              | 2000-2009 | Sub-national | Only urban           | University of Bergen                                                                           |
| Nepal            | Nepal - 1989 - Mukogawa Women’s University                                                                                                                                                                                    | Asia & the Pacific        | LMC | 1989                              | 1980-1989 | Sub-national | Only rural           | Mukogawa Women’s University, Japan                                                             |
| Nepal            | Nepal - 2000/2001 - University of Bergen                                                                                                                                                                                      | Asia & the Pacific        | LMC | 2001                              | 2000-2009 | Sub-national | Only urban           | University of Bergen, Norway                                                                   |
| Niger            | Niger - 2019 - Republique du Niger, Institut National de la Statistique Niger, HC3N                                                                                                                                           | Africa                    | LIC | 2020                              | 2020-2029 | National     | Not specified        | Republique du Niger, Institut National de la Statistique Niger, HC3N                           |
| Nigeria          | Nigeria - 1995 - Federal University of Agriculture, Abeokuta                                                                                                                                                                  | Africa                    | LMC | 1995                              | 1990-1999 | Sub-national | Only urban           | Federal University of Agriculture, Abeokuta, Nigeria                                           |
| Nigeria          | Nigeria - Federal University of Agriculture, Abeokuta                                                                                                                                                                         | Africa                    | LMC | <i>Not available</i> <sup>3</sup> | 2010-2019 | Sub-national | Only rural           | Federal University of Agriculture, Abeokuta, Nigeria                                           |
| Nigeria          | Nigeria - 2011 - HarvestPlus                                                                                                                                                                                                  | Africa                    | LMC | 2011                              | 2010-2019 | Sub-national | Both rural and urban | International Institute of Tropical Agriculture (IITA)                                         |
| Nigeria          | Nigeria - 2007 - Ambrose Alli University                                                                                                                                                                                      | Africa                    | LMC | 2007                              | 2000-2009 | Sub-national | Only rural           | Ambrose Alli University, Nigeria and Michael Okpara University of Agriculture Umudike, Nigeria |

<sup>3</sup> For surveys with missing information for end year, the decade was imputed based on the documentation publication date.

|                  |                                                                                                                                   |                           |     |      |           |              |                      |                                                                                                                                     |
|------------------|-----------------------------------------------------------------------------------------------------------------------------------|---------------------------|-----|------|-----------|--------------|----------------------|-------------------------------------------------------------------------------------------------------------------------------------|
| Nigeria          | Nigeria - 2001/2003 - International Institute of Tropical Agriculture                                                             | Africa                    | LMC | 2003 | 2000-2009 | Sub-national | Both rural and urban | International Institute of Tropical Agriculture, Nigeria                                                                            |
| Nigeria          | Food consumption and nutritional status of health workers in Ogun state                                                           | Africa                    | LMC | 2018 | 2010-2019 | Sub-national | Both rural and urban | Federal University of Agriculture, Abeokuta                                                                                         |
| Nigeria          | Nigeria - 2021 - National Food Consumption and Nutrition Survey                                                                   | Africa                    | LMC | 2021 | 2020-2029 | National     | Not specified        | Federal Ministry of Agriculture and Rural Development, Nigeria                                                                      |
| Pakistan         | Women First Dietary Recall Data: Thatta, Pakistan 2014/2016                                                                       | Asia & the Pacific        | LMC | 2016 | 2010-2019 | Sub-national | Only rural           | Aga Khan University, Karachi, Pakistan                                                                                              |
| Pakistan         | Pakistan - 2008/2009 - University of Tübingen                                                                                     | Asia & the Pacific        | LMC | 2009 | 2000-2009 | Sub-national | Only urban           | University of Tübingen, Germany                                                                                                     |
| Pakistan         | Study of Environmental Enteropathy and Malnutrition in Pakistan (SEEM-Pakistan) Protocol                                          | Asia & the Pacific        | LMC | 2019 | 2010-2019 | Sub-national | Both rural and urban | Aga Khan University                                                                                                                 |
| Pakistan         | ADOLESCENT HEALTH, NUTRITION AND WELL-BEING SURVEY IN TANDO MUHAMMAD KHAN (TMK) DISTRICT, SINDH                                   | Asia & the Pacific        | LMC | 2021 | 2020-2029 | Sub-national | Both rural and urban | Trust for Vaccines & Immunization: TVI                                                                                              |
| Panama           | Panama - 2003 - ProPAN                                                                                                            | Latin America & Caribbean | UMC | 2003 | 2000-2009 | Sub-national | Only urban           | Ministerio de Salud (MINSAL); Organización Panamericana de la Salud (OPS); Instituto de Nutrición de Centroamérica y Panamá (INCAP) |
| Panama           | Panama - 2009 - ProPAN                                                                                                            | Latin America & Caribbean | UMC | 2009 | 2000-2009 | Sub-national | Only rural           | Ministerio de Salud - MINSAL                                                                                                        |
| Papua New Guinea | Papua New Guinea - 2010/2011 - National Institute of Health and Nutrition, Tokyo                                                  | Asia & the Pacific        | LMC | 2011 | 2010-2019 | Sub-national | Both rural and urban | National Institute of Health and Nutrition, Japan; Department of Health, Port Moresby, Papua New Guinea                             |
| Peru             | Peru - 2004/2005 - National Survey on Nutritional, Biochemical, Socioeconomic Indicators Related to Chronic Degenerative Diseases | Latin America & Caribbean | UMC | 2005 | 2000-2009 | National     | Both rural and urban | Centro Nacional de Alimentación y Nutrición, Instituto Nacional de Salud                                                            |
| Peru             | Peru - 2003 - National Food Consumption Survey for Fertile Women and 12 to 35 Month Old Children                                  | Latin America & Caribbean | UMC | 2003 | 2000-2009 | National     | Both rural and urban | Centro Nacional de Alimentación y Nutrición, Instituto Nacional de Salud                                                            |
| Peru             | Peru - 2015 - Latin American Study of Nutrition and Health / Estudio Latinoamericano de Nutrición y Salud (ELANS)                 | Latin America & Caribbean | UMC | 2015 | 2010-2019 | National     | Only urban           | Instituto de Investigación Nutricional, Peru                                                                                        |
| Peru             | Vigilancia Alimentaria y Nutricional por etapas de vida – VIANEV - niños menores de 36 meses - 2015                               | Latin America & Caribbean | UMC | 2015 | 2010-2019 | National     | Both rural and urban | INSTITUTO NACIONAL DE SALUD                                                                                                         |
| Philippines      | 6th Philippines National Nutrition Survey (NNS) - 2003 - Dietary component (lactating women) - DOST-FNRI                          | Asia & the Pacific        | LMC | 2003 | 2000-2009 | National     | Both rural and urban | Food and Nutrition Research Institute of the                                                                                        |

|                    |                                                                                                                                                                                                     |                       |     |      |           |              |                      |                                                                                                                                                                         |
|--------------------|-----------------------------------------------------------------------------------------------------------------------------------------------------------------------------------------------------|-----------------------|-----|------|-----------|--------------|----------------------|-------------------------------------------------------------------------------------------------------------------------------------------------------------------------|
|                    |                                                                                                                                                                                                     |                       |     |      |           |              |                      | Department of Science and Technology (DOST-FNRI))                                                                                                                       |
| Philippines        | 8th Philippines National Nutrition Survey (NNS) - 2013 - Dietary component - DOST-FNRI                                                                                                              | Asia & the Pacific    | LMC | 2014 | 2010-2019 | National     | Both rural and urban | Food and Nutrition Research Institute of the Department of Science and Technology (DOST-FNRI))                                                                          |
| Philippines        | 7th Philippines National Nutrition Survey (NNS) - 2008 - Dietary component - DOST-FNRI                                                                                                              | Asia & the Pacific    | LMC | 2009 | 2000-2009 | National     | Both rural and urban | Food and Nutrition Research Institute of the Department of Science and Technology (DOST-FNRI))                                                                          |
| Philippines        | Philippines - 2002 - Cebu Longitudinal Health and Nutrition Survey (CLHNS) <sup>4</sup>                                                                                                             | Asia & the Pacific    | LMC | 2003 | 1980-2019 | Sub-national | Both rural and urban | USC-Office of Population Studies Foundation, Inc.                                                                                                                       |
| Philippines        | Philippines - 1994 - Cebu Longitudinal Health and Nutrition Survey (CLHNS) <sup>1</sup>                                                                                                             | Asia & the Pacific    | LMC | 1996 | 1990-1999 | Sub-national | Both rural and urban | USC-Office of Population Studies Foundation, Inc.                                                                                                                       |
| Philippines        | Philippines - 1998 - Cebu Longitudinal Health and Nutrition Survey (CLHNS) <sup>1</sup>                                                                                                             | Asia & the Pacific    | LMC | 1999 | 1990-1999 | Sub-national | Both rural and urban | USC-Office of Population Studies Foundation, Inc.                                                                                                                       |
| Philippines        | Philippines - 2012 - Cebu Longitudinal Health and Nutrition Survey (CLHNS) <sup>1</sup>                                                                                                             | Asia & the Pacific    | LMC | 2013 | 2010-2019 | Sub-national | Both rural and urban | USC-Office of Population Studies Foundation, Inc.                                                                                                                       |
| Philippines        | Philippines - 2015 - Cebu Longitudinal Health and Nutrition Survey (CLHNS) <sup>1</sup>                                                                                                             | Asia & the Pacific    | LMC | 2016 | 2010-2019 | Sub-national | Both rural and urban | USC-Office of Population Studies Foundation, Inc.                                                                                                                       |
| Philippines        | Philippines - 1983 - 1986 - Cebu Longitudinal Health and Nutrition Survey (CLHNS) <sup>1</sup>                                                                                                      | Asia & the Pacific    | LMC | 1986 | 1980-1989 | Sub-national | Both rural and urban | USC-Office of Population Studies Foundation, Inc.                                                                                                                       |
| Philippines        | Philippines - 2005 - Cebu Longitudinal Health and Nutrition Survey (CLHNS) <sup>1</sup>                                                                                                             | Asia & the Pacific    | LMC | 2005 | 2000-2009 | Sub-national | Both rural and urban | USC-Office of Population Studies Foundation, Inc.                                                                                                                       |
| Romania            | Romania - 2012 - DIETA PILOT Adults Study                                                                                                                                                           | Europe & Central Asia | UMC | 2012 | 2010-2019 | National     | Both rural and urban | Dunărea de Jos University of Galați                                                                                                                                     |
| Romania            | Romania - 2012 - DIETA PILOT Children Study                                                                                                                                                         | Europe & Central Asia | UMC | 2012 | 2010-2019 | National     | Both rural and urban | Dunărea de Jos University of Galați                                                                                                                                     |
| Russian Federation | Russian Federation - 1995/2014 - Russian Longitudinal Monitoring Survey (Phase II)                                                                                                                  | Europe & Central Asia | UMC | 2015 | 1990-2019 | National     | Both rural and urban | Center for Longitudinal Studies, National Research University Higher School of Economics and Institute of Sociology, Russian Academy of Sciences, Moscow, Russia        |
| Russian Federation | Russian Federation - 2001 - The State Research Center for Preventive Medicine of the Ministry of Health of the Russian Federation/Institute of Nutrition of the Russian Academy of Medical Sciences | Europe & Central Asia | UMC | 2001 | 2000-2009 | Sub-national | Only urban           | The State Research Center for Preventive Medicine of the Ministry of Health of the Russian Federation/Institute of Nutrition of the Russian Academy of Medical Sciences |

<sup>4</sup> The Philippines CEBU surveys were considered as one longitudinal survey in the Results Section.

|                       |                                                                                                                                             |                          |     |      |           |              |                      |                                                                                                                                                 |
|-----------------------|---------------------------------------------------------------------------------------------------------------------------------------------|--------------------------|-----|------|-----------|--------------|----------------------|-------------------------------------------------------------------------------------------------------------------------------------------------|
| Russian Federation    | Russian Federation - 2006 - Institute of Nutrition, Russian Academy of Medical Sciences (RAMS)                                              | Europe & Central Asia    | UMC | 2006 | 2000-2009 | National     | Not specified        | Institute of Nutrition of the Russian Academy of Medical Sciences, Institute of Sociology of the Russian Academy of Sciences, Gerber and Nestle |
| Russian Federation    | Russian Federation - Saratov State Medical University                                                                                       | Europe & Central Asia    | UMC | 2011 | 2010-2019 | Sub-national | Only urban           | Saratov State Medical University                                                                                                                |
| Russian Federation    | Russian Federation - 1992/1994 - Russian Longitudinal Monitoring Survey (Phase I)                                                           | Europe & Central Asia    | UMC | 1994 | 1990-1999 | National     | Both rural and urban | Carolina Population Center at the University of North Carolina at Chapel Hill and Demoscope team                                                |
| Rwanda                | Rwanda - 2010/2011 - Food and Nutrition Survey                                                                                              | Africa                   | LIC | 2010 | 2010-2019 | Sub-national | Only rural           | HealthBridge                                                                                                                                    |
| Samoa                 | Samoa - 1990 - Hawaii Department of Health                                                                                                  | Asia & the Pacific       | LMC | 1990 | 1990-1999 | National     | Not specified        | Hawaii Department of Health                                                                                                                     |
| Sao Tome and Principe | Nutritional adequacy in undernourished children from 6 to 59 months of age, in Cantagalo, São Tomé e Príncipe                               | Africa                   | LMC | 2015 | 2010-2019 | Sub-national | Only rural           | The Helpeo Association                                                                                                                          |
| Serbia                | Serbia - 2014/2015 - University of Belgrade                                                                                                 | Europe & Central Asia    | UMC | 2015 | 2010-2019 | National     | Not specified        | University of Belgrade                                                                                                                          |
| Serbia                | Kosovo - 2010/2011 - University of Kassel                                                                                                   | Europe & Central Asia    | UMC | 2011 | 2010-2019 | Sub-national | Only urban           | University of Kassel                                                                                                                            |
| Solomon Islands       | Solomon Islands - 2005 - University of California                                                                                           | Asia & the Pacific       | LMC | 2005 | 2000-2009 | Sub-national | Not specified        | University of California, Santa Barbara                                                                                                         |
| South Africa          | South Africa - 1999 - National Food Consumption Survey (NFCS)                                                                               | Africa                   | UMC | 1999 | 1990-1999 | National     | Both rural and urban | University of Stellenbosch and Tygerberg Academic Hospital                                                                                      |
| Sri Lanka             | Sri Lanka - 2006 - University of Colombo                                                                                                    | Asia & the Pacific       | LMC | 2006 | 2000-2009 | National     | Both rural and urban | University of Colombo, Sri Lanka                                                                                                                |
| Sri Lanka             | Dietary Intakes of Sri Lankan Children 6-14 years                                                                                           | Asia & the Pacific       | LMC | 2021 | 2020-2029 | National     | Both rural and urban | Upfield Research and Development                                                                                                                |
| Sudan                 | Sudan - 2006 - London Metropolitan University                                                                                               | Africa                   | LIC | 2006 | 2000-2009 | Sub-national | Both rural and urban | London Metropolitan University                                                                                                                  |
| Tajikistan            | Tajikistan - 2000/2005 - Kazakh Academy of Nutrition                                                                                        | Europe & Central Asia    | LMC | 2005 | 2000-2009 | National     | Not specified        | Kazakh Academy of Nutrition                                                                                                                     |
| Thailand              | Thailand - 2011 - SEANUTS                                                                                                                   | Asia & the Pacific       | UMC | 2011 | 2010-2019 | National     | Both rural and urban | FrieslandCampina                                                                                                                                |
| Thailand              | Thailand - 2008/2009 - Bureau of Nutrition, Department of Health, Ministry of Public Health                                                 | Asia & the Pacific       | UMC | 2009 | 2000-2009 | National     | Both rural and urban | Bureau of Nutrition, Department of Health, Ministry of Public Health                                                                            |
| Tunisia               | Tunisia - 2011 - National Institute of Public Health                                                                                        | Near East & North Africa | LMC | 2011 | 2010-2019 | Sub-national | Both rural and urban | National Institute of Public Health                                                                                                             |
| Tunisia               | Understanding the Nutritional Transition in the Maghreb to Contribute to the Prevention of Obesity and Non-communicable Diseases. 2009-2010 | Near East & North Africa | LMC | 2010 | 2010-2019 | Sub-national | Both rural and urban | National Institute of Nutrition and Food Technology                                                                                             |
| Tunisia               | Tunisian National Nutrition Survey 1996-1997: Assessment of the nutritional status of the Tunisian population                               | Near East & North Africa | LMC | 1997 | 1990-1999 | National     | Both rural and urban | National Institute of Nutrition and Food Technology                                                                                             |

|                                    |                                                                                                                                               |                           |                  |      |           |              |                      |                                                                                                                                                                                                                                                                      |
|------------------------------------|-----------------------------------------------------------------------------------------------------------------------------------------------|---------------------------|------------------|------|-----------|--------------|----------------------|----------------------------------------------------------------------------------------------------------------------------------------------------------------------------------------------------------------------------------------------------------------------|
| Uganda                             | HarvestPlus Reaching End Users (REU) Orange-Fleshed Sweet Potato (OFSP) Project                                                               | Africa                    | LIC              | 2007 | 2000-2009 | Sub-national | Only rural           | HarvestPlus, International Food Policy Research Institute (IFPRI)                                                                                                                                                                                                    |
| Uganda                             | The 2008 Uganda Food Consumption Survey                                                                                                       | Africa                    | LIC              | 2008 | 2000-2009 | Sub-national | Both rural and urban | USAID                                                                                                                                                                                                                                                                |
| Uganda                             | Uganda - 2006 - Makerere University                                                                                                           | Africa                    | LIC              | 2006 | 2000-2009 | Sub-national | Both rural and urban | Makerere University, Uganda                                                                                                                                                                                                                                          |
| Uganda                             | Contribution of locally processed fruits and vegetables towards sustainable nutrition in East Africa: studies from Kenya, Tanzania and Uganda | Africa                    | LIC              | 2020 | 2020-2029 | Sub-national | Only rural           | Makerere University and University of Goettingen                                                                                                                                                                                                                     |
| Ukraine                            | Ukraine - 2012/2013 - State Research Center for Food Hygiene, Ministry of Health                                                              | Europe & Central Asia     | LMC              | 2013 | 2010-2019 | National     | Both rural and urban | State Research Center for Food Hygiene, Ministry of Health                                                                                                                                                                                                           |
| United Republic of Tanzania        | United Republic of Tanzania - 2013 - Ghent University                                                                                         | Africa                    | LMC              | 2013 | 2010-2019 | Sub-national | Only rural           | Ghent University                                                                                                                                                                                                                                                     |
| United Republic of Tanzania        | Scale-N Nutrition Survey 2016                                                                                                                 | Africa                    | LMC              | 2016 | 2010-2019 | Sub-national | Only rural           | 1. Department of Food Science & Technology, Faculty of Agriculture, Sokoine University of Agriculture (SUA)<br>2. Dept. of Biological Chemistry and Nutrition, University of Hohenheim (UHOH), and 3. Leibniz Centre for Agricultural Landscape Research (ZALF) e.V. |
| United Republic of Tanzania        | Tanzania - 2009 - McGill University                                                                                                           | Africa                    | LMC              | 2009 | 2000-2009 | Sub-national | Only rural           | McGill University, Canada and Bioversity International                                                                                                                                                                                                               |
| United Republic of Tanzania        | Contribution of locally processed fruits and vegetables towards sustainable nutrition in East Africa: studies from Kenya, Tanzania and Uganda | Africa                    | LMC              | 2020 | 2020-2029 | Sub-national | Only rural           | Makerere University and University of Goettingen                                                                                                                                                                                                                     |
| Vanuatu                            | Vanuatu - 1985 - South Pacific Commission/WHO                                                                                                 | Asia & the Pacific        | LMC              | 1985 | 1980-1989 | Sub-national | Both rural and urban | South Pacific Commission/WHO                                                                                                                                                                                                                                         |
| Venezuela (Bolivarian Republic of) | Venezuela - 2015 - Latin American Study of Nutrition and Health / Estudio Latinoamericano de Nutrición y Salud (ELANS)                        | Latin America & Caribbean | UMC <sup>5</sup> | 2015 | 2010-2019 | National     | Only urban           | Universidad Central de Venezuela                                                                                                                                                                                                                                     |
| Venezuela (Bolivarian Republic of) | Venezuela - 1999/2000 - Centro de Atención Nutricional Infantil Antimano                                                                      | Latin America & Caribbean | UMC <sup>1</sup> | 2000 | 2000-2009 | Sub-national | Only urban           | Centro de Atención Nutricional Infantil Antimano (CANIA)                                                                                                                                                                                                             |

<sup>5</sup> The World Bank did not assign the income level to Venezuela in the 2021 update pending the release of revised national accounts statistics. The income level for Venezuela refers to the previous year classification.

|                                    |                                                                                                                                |                           |                  |                                   |           |              |                      |                                                                                                                       |
|------------------------------------|--------------------------------------------------------------------------------------------------------------------------------|---------------------------|------------------|-----------------------------------|-----------|--------------|----------------------|-----------------------------------------------------------------------------------------------------------------------|
| Venezuela (Bolivarian Republic of) | Venezuela - 2002 - CEINUT, Universidad de Carabobo                                                                             | Latin America & Caribbean | UMC <sup>1</sup> | 2002                              | 2000-2009 | Sub-national | Only urban           | Centro de Investigaciones en Nutrición "Dr. Eleazar Lara Pantin" (CEINUT), Universidad de Carabobo                    |
| Venezuela (Bolivarian Republic of) | Venezuela - 1998/1999 - CEINUT, Universidad de Carabobo                                                                        | Latin America & Caribbean | UMC <sup>6</sup> | 1999                              | 1990-1999 | Sub-national | Only urban           | Centro de Investigaciones en Nutrición "Dr. Eleazar Lara Pantin" (CEINUT), Universidad de Carabobo                    |
| Venezuela (Bolivarian Republic of) | Venezuela - 2013 - Encuesta Nacional de Consumo de Alimentos (ENCA)                                                            | Latin America & Caribbean | UMC <sup>1</sup> | 2013                              | 2010-2019 | National     | Both rural and urban | National Institute of Statistics, Ministry of Popular Power for Planning, Venezuela                                   |
| Vietnam                            | Vietnam - 2014 - Bioversity                                                                                                    | Asia & the Pacific        | LMC              | 2014                              | 2010-2019 | Sub-national | Only rural           | Bioversity International; HealthBridge Vietnam                                                                        |
| Vietnam                            | Vietnam - 2011 - SEANUTS                                                                                                       | Asia & the Pacific        | LMC              | 2011                              | 2010-2019 | National     | Both rural and urban | FrieslandCampina                                                                                                      |
| Vietnam                            | Vietnam - Japan Women's University                                                                                             | Asia & the Pacific        | LMC              | <i>Not available</i> <sup>7</sup> | 1990-1999 | Sub-national | Only urban           | Japan Women's University                                                                                              |
| Vietnam                            | Vietnam - 2006 - Institute of Tropical Medicine, Antwerp                                                                       | Asia & the Pacific        | LMC              | 2006                              | 2000-2009 | Sub-national | Both rural and urban | Institute of Tropical Medicine, Antwerp (Belgium), Ghent University, National Institute of Nutrition, Hanoi (Vietnam) |
| Vietnam                            | Vietnam - 1999 - Japan Women's University                                                                                      | Asia & the Pacific        | LMC              | 1999                              | 1990-1999 | Sub-national | Both rural and urban | Japan Women's University, Japan                                                                                       |
| Vietnam                            | South East Asian Nutrition Survey II (SEANUTS II) in Vietnam: Nutrition survey of Vietnamese children aged 0.5 to 11 years old | Asia & the Pacific        | LMC              | 2021                              | 2020-2029 | National     | Both rural and urban | National Institute of nutrition                                                                                       |
| Vietnam                            | Vietnam 2019 General Nutrition Survey                                                                                          | Asia & the Pacific        | LMC              | 2020                              | 2020-2029 | National     | Both rural and urban | Vietnam National Institute of Nutrition (NIN), MOH                                                                    |
| West Bank and Gaza Strip           | West Bank and Gaza Strip - 2002 - Al-Quds University/Johns Hopkins Bloomberg School of Public Health                           | Near East & North Africa  | LMC              | 2002                              | 2000-2009 | National     | Both rural and urban | Al-Quds University, Palestine; Johns Hopkins Bloomberg School of Public Health, USA                                   |
| West Bank and Gaza Strip           | West Bank and Gaza Strip - 2003 - Al-Quds University/Johns Hopkins Bloomberg School of Public Health                           | Near East & North Africa  | LMC              | 2003                              | 2000-2009 | National     | Both rural and urban | Al-Quds University, Palestine; Johns Hopkins Bloomberg School of Public Health, USA                                   |
| Zambia                             | Zambia - 2008 - Zambian National Food and Nutrition Commission                                                                 | Africa                    | LMC              | 2008                              | 2000-2009 | Sub-national | Only rural           | Zambian National Food and Nutrition Commission, Zambian Tropical Disease Research Center, UNICEF                      |

<sup>6</sup> The World Bank did not assign the income level to Venezuela in the 2021 update pending the release of revised national accounts statistics. The income level for Venezuela refers to the previous year classification.

<sup>7</sup> For surveys with missing information for end year, the decade was imputed based on the documentation publication date.

|          |                                                                                                                       |        |     |      |           |              |                      |                                                                                                                                         |
|----------|-----------------------------------------------------------------------------------------------------------------------|--------|-----|------|-----------|--------------|----------------------|-----------------------------------------------------------------------------------------------------------------------------------------|
|          |                                                                                                                       |        |     |      |           |              |                      | Zambia, University of Arizona                                                                                                           |
| Zambia   | The 2009 Food consumption and Vitamin A status survey in Zambia                                                       | Africa | LMC | 2009 | 2000-2009 | Sub-national | Only rural           | HarvestPlus (IFPRI), National Food and Nutrition Commission (Lusaka, Zambia), and the Tropical Diseases Research Centre (Ndola, Zambia) |
| Zambia   | Zambia - 2012/2013 - Johns Hopkins University                                                                         | Africa | LMC | 2013 | 2010-2019 | Sub-national | Only rural           | Johns Hopkins University                                                                                                                |
| Zambia   | Zambia - 2012 - University of Wisconsin                                                                               | Africa | LMC | 2012 | 2010-2019 | Sub-national | Only rural           | University of Wisconsin                                                                                                                 |
| Zambia   | Minimum Dietary Diversity validation study using weighed food records among women of reproductive age in rural Zambia | Africa | LMC | 2019 | 2010-2019 | Sub-national | Only rural           | University of Zambia                                                                                                                    |
| Zambia   | Zambia Food Consumption and Nutrition Survey 2012                                                                     | Africa | LMC | 2012 | 2010-2019 | Sub-national | Only rural           | National Food and Nutrition Commission                                                                                                  |
| Zambia   | Zambia Food Consumption and Micronutrient Survey for 2020                                                             | Africa | LMC | 2020 | 2020-2029 | National     | Both rural and urban | National Food and Nutrition Commission                                                                                                  |
| Zimbabwe | Zimbabwe - 2003 - McMaster University                                                                                 | Africa | LMC | 2003 | 2000-2009 | Sub-national | Both rural and urban | McMaster University                                                                                                                     |
