# Supplementary material for: Global Trends in the Availability of Dietary Data in Low and Middle-Income Countries
Source: MDPI journal article supplement (doi:10.3390/nu14142987), 2022-07-21
Supplement: s1 [file s1 › de Quadros et al_table S2_proof.pdf]

**Table S2.** List of dietary surveys conducted in LMICs and related details for dietary assessment method, presence of repeated dietary recall/records and number of recalls/records per subject, survey administration method, population groups, minimum and maximum ages in years.

| Country        | Survey name                                                                                                                                           | Dietary assessment method                                  | Repeated dietary recall/record | Number of repeated recalls/records per subject | Survey administration method | Population groups                                                                                                           | Minimum age in years | Maximum age in years |
|----------------|-------------------------------------------------------------------------------------------------------------------------------------------------------|------------------------------------------------------------|--------------------------------|------------------------------------------------|------------------------------|-----------------------------------------------------------------------------------------------------------------------------|----------------------|----------------------|
| Algeria        | Algeria - 2008/2010 - University of Tlemcen                                                                                                           | 24-hour recall                                             | Yes                            | 3                                              | Paper questionnaire          | Children 6-8 years old                                                                                                      | 6                    | 8                    |
| Algeria        | Algeria - 2010/2014 - University of Tlemcen                                                                                                           | 24-hour recall                                             | Yes                            | 3                                              | Paper questionnaire          | Pregnant women                                                                                                              | Not specified        | Not specified        |
| Algeria        | Algeria - 2011/2012 - University of Tlemcen                                                                                                           | 24-hour recall                                             | Yes                            | 3                                              | Paper questionnaire          | Adolescents 10-17 years old                                                                                                 | 10                   | 17                   |
| American Samoa | American Samoa - 1990 - Hawaii Department of Health                                                                                                   | 24-hour recall                                             | No                             |                                                | Paper questionnaire          | Adults 25 to 55 years                                                                                                       | 25                   | 55                   |
| Argentina      | Argentina - 2015 - Latin American Study of Nutrition and Health / Estudio Latinoamericano de Nutrición y Salud (ELANS)                                | 24-hour recall                                             | Yes                            | 2                                              | Paper questionnaire          | Adults 15-65 years old                                                                                                      | 15                   | 65                   |
| Argentina      | Argentina - 2005 - Encuesta Nacional de Nutrición y Salud (ENNyS)                                                                                     | 24-hour recall                                             | No                             |                                                | Paper questionnaire          | Infants aged 6-23 months;Children aged 2-5 years;Women aged 10-49 years                                                     | 0.5                  | 49                   |
| Argentina      | Argentina - 2012/2013 - Primer estudio sobre el estado nutricional y los hábitos alimentarios de la población adulta de Rosario                       | 24-hour recall                                             | Yes                            | 4                                              | Paper questionnaire          | Adult 18 to 70y both sex                                                                                                    | 18                   | 71                   |
| Argentina      | Argentina - 2019 - 2nd Encuesta Nacional de Nutrición y Salud (ENNyS 2)                                                                               | 24-hour recall                                             | No                             |                                                | Electronic questionnaire     | Infants aged 6-23 months;Children and adolescents 2-17 years old;Adults 18 years old and above                              | 0.5                  | Not specified        |
| Argentina      | Primera Encuesta Alimentaria y Nutricional de la Ciudad Autónoma de Buenos Aires - EAN CABA                                                           | 24-hour recall                                             | No                             |                                                | Paper questionnaire          | Women with children <6m;Children 7-23m;Children 2-4y;Children 5-12y;Adolescent 13-18y;Women 19-49y;Adults >60y              | Not specified        | Not specified        |
| Bangladesh     | HarvestPlus Bangladesh Bio-fortified Rice Project - Baseline Dietary Survey                                                                           | Other: 12-h weighed food records combined with 12-h recall | Yes                            | 2                                              | Paper questionnaire          | Women of reproductive age                                                                                                   | 16                   | 70                   |
| Bangladesh     | Bangladesh Integrated Household Survey (BIHS), 2011-2012                                                                                              | 24-hour recall                                             | No                             |                                                | Paper questionnaire          | Whole population                                                                                                            | 0                    | 120                  |
| Bangladesh     | Bangladesh - 1996 - IFPRI                                                                                                                             | 24-hour recall                                             | Yes                            | 2                                              | Paper questionnaire          | Women 15-49 years old                                                                                                       | 15                   | 49                   |
| Bangladesh     | Aquatic food production systems (gher) across the saline gradients in the southwest coastal Bangladesh and its nexus to food and nutritional security | 24-hour recall                                             | Yes                            | 2                                              | Paper questionnaire          | Adolescent girls (10-19 years old);Adolescent boys (10-19 years old);Household head/ father (>10 years old);Housemaker/wife | 10                   | 75                   |
| Bangladesh     | Nutrition Survey of Bangladesh 2017-18                                                                                                                | Weighted food record                                       | Yes                            | 2                                              | Paper questionnaire          | Whole population                                                                                                            | 1                    | 97                   |

|                                     |                                                                                                                     |                       |     |               |                          |                                                                                                                                                                                                                                  |     |               |
|-------------------------------------|---------------------------------------------------------------------------------------------------------------------|-----------------------|-----|---------------|--------------------------|----------------------------------------------------------------------------------------------------------------------------------------------------------------------------------------------------------------------------------|-----|---------------|
| Benin                               | Benin - 2012 - Ghent University                                                                                     | 24-hour recall        | Yes | 2             | Paper questionnaire      | Non-pregnant and non-lactating women older than 18 years.                                                                                                                                                                        | 18  | Not specified |
| Benin                               | Benin - FoodAfrica Project - Bioversity 2015                                                                        | 24-hour recall        | Yes | Not specified | Paper questionnaire      | Infant and young children (6-23 months)                                                                                                                                                                                          | 0.5 | 2             |
| Benin                               | Benin - 2014 - Regional Institute of Public Health (IRSP) of Ouidah                                                 | 24-hour recall        | Yes | 2             | Paper questionnaire      | Pregnant women                                                                                                                                                                                                                   | 19  | 31            |
| Benin                               | Benin - 2006 - TRANSNUT                                                                                             | 24-hour recall        | Yes | 3             | Paper questionnaire      | Beninese-born adults                                                                                                                                                                                                             | 25  | 60            |
| Benin                               | Benin - 2007 - Ghent University                                                                                     | 24-hour recall        | Yes | 2             | Paper questionnaire      | School adolescents 13-19 years old                                                                                                                                                                                               | 13  | 19            |
| Bolivia<br>(Plurinational State of) | Bolivia - 2009/2012 - Lund University                                                                               | 24-hour recall        | Yes | 3             | Paper questionnaire      | Women aged 20 to 52 years;Patients with cutaneous leishmaniasis (CL) (12 females and 20 males), aged 14 to 50 years;Healthy controls (12 females and 20 males), aged 14 to 50 years ( $\pm$ 5 years);Children from 4 to 13 years | 4   | 52            |
| Brazil                              | Brazil - 2007 - ASBRAN                                                                                              | 24-hour recall        | No  |               | Paper questionnaire      | Children 12-19 years old                                                                                                                                                                                                         | 12  | 19            |
| Brazil                              | Brazilian National Dietary Survey 2008-2009                                                                         | Estimated food record | Yes | 2             | Paper questionnaire      | General population > 10 years old                                                                                                                                                                                                | 10  | Not specified |
| Brazil                              | Brazil - 2015 - Latin American Study of Nutrition and Health / Estudio Latinoamericano de Nutrición y Salud (ELANS) | 24-hour recall        | Yes | 2             | Paper questionnaire      | Adults 15-65 years old                                                                                                                                                                                                           | 15  | 65            |
| Brazil                              | Health Survey São Paulo (ISA-Capital) 2008                                                                          | 24-hour recall        | Yes | 2             | Paper questionnaire      | Adolescents 12-19 years old;Adults 20-59 years old;Elderly with 60 years old or more                                                                                                                                             | 12  | Not specified |
| Brazil                              | Health Survey of the State of São Paulo (ISA-SP) 2001/2002                                                          | 24-hour recall        | No  |               | Paper questionnaire      | Adults >20 years old                                                                                                                                                                                                             | 20  | Not specified |
| Brazil                              | Health Survey São Paulo (ISA-Capital) 2003                                                                          | 24-hour recall        | Yes | 2             | Paper questionnaire      | Adolescents 12-19 years old;Adults 20-59 years old;Elderly $\geq$ 60 years old                                                                                                                                                   | 12  | Not specified |
| Brazil                              | Brazilian Study of Cardiovascular Risks in Adolescents (ERICA)                                                      | 24-hour recall        | Yes | 2             | Electronic questionnaire | Students from private and public schools                                                                                                                                                                                         | 12  | 17            |
| Brazil                              | Brasilia consumption and physical activity survey - ICA Brasilia                                                    | 24-hour recall        | Yes | 2             | Paper questionnaire      | men over 20 years old;Women over 20 years old                                                                                                                                                                                    | 20  | 87            |
| Bulgaria                            | Bulgaria - 2004 - National Survey Of Food Intake And Nutritional Status (NSFIN)                                     | 24-hour recall        | No  |               | Paper questionnaire      | Adults above 16 years                                                                                                                                                                                                            | 16  | 95            |
| Bulgaria                            | Bulgaria - 2007 - Nutrition and Nutritional Status of Children under 5 years in Bulgaria (NUTRICHILD)               | 24-hour recall        | Yes | 2             | Paper questionnaire      | Children under 5 years                                                                                                                                                                                                           | 0   | 5             |
| Burkina Faso                        | Food consumption and iron status survey in two provinces of rural Burkina Faso                                      | 24-hour recall        | Yes | 2             | Paper questionnaire      | Women of reproductive age;Children aged 36–59 months                                                                                                                                                                             | 3   | 55            |
| Burkina Faso                        | Burkina Faso - 2004 - Ghent University and Institute of Tropical Medicine of Antwerp, Belgium                       | 24-hour recall        | No  |               | Paper questionnaire      | Pregnant women;Non-pregnant women                                                                                                                                                                                                | 15  | 45            |
| Burkina Faso                        | Burkina Faso - 2010 - Université de Montréal                                                                        | 24-hour recall        | Yes | 2             | Paper questionnaire      | Adults from different income proxies                                                                                                                                                                                             | 25  | 60            |
| Burkina Faso                        | Burkina Faso - 2006 - IRD                                                                                           | 24-hour recall        | Yes | 3             | Paper questionnaire      | Women of reproductive age                                                                                                                                                                                                        | 17  | 49            |

|                                  |                                                                                                                                                    |                       |     |    |                                                             |                                                                                                      |     |               |
|----------------------------------|----------------------------------------------------------------------------------------------------------------------------------------------------|-----------------------|-----|----|-------------------------------------------------------------|------------------------------------------------------------------------------------------------------|-----|---------------|
| Burkina Faso                     | Burkina Faso - 2014 - Moderate Acute Malnutrition Out Study                                                                                        | 24-hour recall        | Yes | 2  | Paper questionnaire                                         | Children - control;Children - intervention                                                           | 1   | 2             |
| Cabo Verde                       | Cabo Verde - 2014 - Universidade Nova de Lisboa                                                                                                    | 24-hour recall        | No  |    | Paper questionnaire                                         | Adults from 3 different urban units                                                                  | 18  | Not specified |
| Cambodia                         | Cambodia - 2010 - Institute of Technology of Cambodia                                                                                              | 24-hour recall        | Yes | 2  | Paper questionnaire                                         | Adults                                                                                               | 25  | 65            |
| Cameroon                         | Cameroon - 2012 - University of Douala                                                                                                             | 24-hour recall        | Yes | 3  | Paper questionnaire                                         | Adults (89 men and 163 women)                                                                        | 18  | 70            |
| Cameroon                         | Cameroon - 2006 - Umeå University                                                                                                                  | 24-hour recall        | Yes | 3  | Paper questionnaire                                         | Adolescents 12-16 years old                                                                          | 12  | 16            |
| Cameroon                         | Cameroon - 2013 - Ghent University                                                                                                                 | 24-hour recall        | No  |    | Paper questionnaire                                         | Children 12-24 months                                                                                | 1   | 2             |
| Cameroon                         | Cameroon - 2009 - UC Davis/Hellen Keller International/Ministry of Public Health, Cameroon                                                         | 24-hour recall        | Yes | 2  | Paper questionnaire                                         | Preschool children aged 12-59 months old ;Women of reproductive age 15-49 years old                  | 1   | 49            |
| China                            | China Health and Nutrition Survey (CHNS)                                                                                                           | 24-hour recall        | Yes | 10 | Paper questionnaire until 2006, e-questionnaire since 2009. | Whole population                                                                                     | 6   | 100           |
| Colombia                         | Colombia - 2015 - Latin American Study of Nutrition and Health / Estudio Latinoamericano de Nutrición y Salud (ELANS)                              | 24-hour recall        | Yes | 2  | Paper questionnaire                                         | Adults 15-65 years old                                                                               | 15  | 65            |
| Colombia                         | Colombia - 2005 - ProPAN                                                                                                                           | 24-hour recall        | No  |    | Paper questionnaire                                         | Children 6-48 months old                                                                             | 0.5 | 4             |
| Colombia                         | Colombia - 2015 - Encuesta Nacional de la Situación Nutricional (ENSIN)                                                                            | 24-hour recall        | Yes | 2  | Electronic questionnaire                                    | Whole population                                                                                     | 0   | 64            |
| Costa Rica                       | Costa Rica - 1996 - INCIENSA                                                                                                                       | Estimated food record | Yes | 3  | Paper questionnaire                                         | Adolescents 12-19 years old                                                                          | 12  | 19            |
| Costa Rica                       | Costa Rica - 2006 - INCIENSA                                                                                                                       | Estimated food record | Yes | 3  | Paper questionnaire                                         | Adolescents 12-17 years old                                                                          | 12  | 17            |
| Costa Rica                       | Costa Rica - 1999/2000 - Encuesta Nacional de Nutrición - Comunidades centinela                                                                    | 24-hour recall        | Yes | 2  | Paper questionnaire                                         | Children 1-6 years old                                                                               | 1   | 6             |
| Costa Rica                       | Costa Rica - 2015 - Latin American Study of Nutrition and Health / Estudio Latinoamericano de Nutrición y Salud (ELANS)                            | 24-hour recall        | Yes | 2  | Paper questionnaire                                         | Adults 15-65 years old                                                                               | 15  | 65            |
| Costa Rica                       | Farm to School: a multicomponent food system intervention to increase consumption of Fruit and Vegetables in Costa Rica                            | 24-hour recall        | Yes | 2  | Electronic questionnaire                                    | Children from 9 to 12 years old (control group);Children from 9 to 12 years old (intervention group) | 8   | 12            |
| Côte d'Ivoire                    | Évaluation de la consommation alimentaire et de l'apport en nutriments des enfants de 6 à 12 ans et des femmes en âge de procréer en Côte d'Ivoire | 24-hour recall        | Yes | 2  | Electronic questionnaire                                    | Enfants en âge scolaire;femmes en âge de procréer                                                    | 8   | 49            |
| Democratic Republic of the Congo | Democratric Republic of Congo - 2009 - University of Kisangani/Ghent University                                                                    | 24-hour recall        | Yes | 2  | Paper questionnaire                                         | Adult women                                                                                          | 15  | 72            |
| Democratic Republic of the Congo | Women First Dietary Recall Data: Sud-Ubangi, Democratic Republic of the Congo 2014/2016                                                            | 24-hour recall        | Yes | 2  | Paper questionnaire                                         | 1st trimester pregnant women                                                                         | 16  | 34            |

|                   |                                                                                                                                                                      |                      |     |   |                     |                                                                                                                                                |               |               |
|-------------------|----------------------------------------------------------------------------------------------------------------------------------------------------------------------|----------------------|-----|---|---------------------|------------------------------------------------------------------------------------------------------------------------------------------------|---------------|---------------|
| Dominica          | Dominica - 2005/2006 - Clemson University                                                                                                                            | 24-hour recall       | Yes | 2 | Paper questionnaire | Children 5-11 years old                                                                                                                        | 5             | 11            |
| Ecuador           | Ecuador - 2002 - ProPAN                                                                                                                                              | 24-hour recall       | Yes | 2 | Paper questionnaire | Children 6-25 months                                                                                                                           | 0.5           | 2             |
| Ecuador           | Ecuador - 2015 - Latin American Study of Nutrition and Health / Estudio Latinoamericano de Nutrición y Salud (ELANS)                                                 | 24-hour recall       | Yes | 2 | Paper questionnaire | Adults 15-65 years old                                                                                                                         | 15            | 65            |
| Ecuador           | Ecuador - 2012 - Encuesta Nacional de Salud y Nutrición (ENSANUT-ECU)                                                                                                | 24-hour recall       | No  |   | Paper questionnaire | Whole population                                                                                                                               | 1             | 59            |
| Egypt             | Egypt - 1994 - Agriculture Research Centre (FTRI/ARC)                                                                                                                | 24-hour recall       | No  |   | Paper questionnaire | Adult female survey respondent;Children aged 2–6 years                                                                                         | 2             | Not specified |
| Egypt             | Egypt - 1981 - National Nutrition Institute                                                                                                                          | 24-hour recall       | No  |   | Paper questionnaire | Whole population                                                                                                                               | Not specified | Not specified |
| Egypt             | Egypt - 1998 - National Nutrition Institute                                                                                                                          | 24-hour recall       | No  |   | Paper questionnaire | One child (2-18 years old) for each household, and his/her mother were collected with a total sample of 1669 households with 9134 individuals. | 2             | Not specified |
| Egypt             | Egypt - University of Maryland                                                                                                                                       | 24-hour recall       | No  |   | Paper questionnaire | Adolescents girls 11-19 years old                                                                                                              | 11            | 19            |
| Equatorial Guinea | Equatorial Guinea - 1997 - Instituto de Salud Carlos III                                                                                                             | 24-hour recall       | No  |   | Paper questionnaire | Children <5 years old                                                                                                                          | Not specified | 5             |
| Equatorial Guinea | Equatorial Guinea - 2004 - Instituto de Salud Carlos III                                                                                                             | 24-hour recall       | No  |   | Paper questionnaire | Children <5 years old                                                                                                                          | Not specified | 5             |
| Ethiopia          | Ethiopia - 2011 - Ethiopian Public Health Institute (EPHI)                                                                                                           | 24-hour recall       | No  |   | Paper questionnaire | Young children 6-35 months;Adult females 15-45 years;Adult urban males 19-45 years                                                             | 0.5           | 45            |
| Ethiopia          | Ethiopia - 2009 - Instituto de Salud Carlos III                                                                                                                      | 24-hour recall       | Yes | 2 | Paper questionnaire | Children 4-15 years                                                                                                                            | 4             | 15            |
| Ethiopia          | Ethiopia - 2005 - University of Gondar                                                                                                                               | 24-hour recall       | Yes | 3 | Paper questionnaire | Adults                                                                                                                                         | 18            | Not specified |
| Ethiopia          | Dietary Practices, Maternal Nutritional Status and Child Stunting: Comparative and Intervention Studies in Pulse and Non-pulse Growing Rural Communities in Ethiopia | Weighted food record | No  |   | Paper questionnaire | Children 6-59 months old;Mothers who had at least one under five years of age child in the study communities                                   | 0.2           | 48            |
| Ethiopia          | Ethiopia - 2009/2010 - Jimma University                                                                                                                              | 24-hour recall       | Yes | 2 | Paper questionnaire | Children 6-12 months old                                                                                                                       | 0.5           | 1             |
| Ethiopia          | Ethiopia - 2013/2014 - Addis Ababa University                                                                                                                        | 24-hour recall       | Yes | 2 | Paper questionnaire | Children 12-23 months old                                                                                                                      | 1             | 2             |
| Ethiopia          | Dietary behavior, food and nutrient intake of pregnant and non-pregnant women of Southern Ethiopia                                                                   | 24-hour recall       | Yes | 2 | Paper questionnaire | Pregnant women;Non-pregnant women                                                                                                              | 18            | 45            |
| Ethiopia          | Ethiopia - 2014 - University of Saskatchewan                                                                                                                         | 24-hour recall       | No  |   | Paper questionnaire | Children 6-23 months old                                                                                                                       | 0.5           | 2             |
| Fiji              | Fiji - 1980 - Cardiovascular and Metabolic Disease Survey                                                                                                            | 24-hour recall       | No  |   | Paper questionnaire | Melanesian adults (n=166 urban; n=116 rural);Indian adults (n=108 urban; n=120 rural)                                                          | 20            | Not specified |
| Fiji              | Fiji - 1996 - Japan Women's University                                                                                                                               | 24-hour recall       | Yes | 3 | Paper questionnaire | Women 30-39 years old                                                                                                                          | 30            | 39            |
| Fiji              | Fiji - 2004 - National Nutrition Survey                                                                                                                              | 24-hour recall       | Yes | 2 | Paper questionnaire | Adults 15-44 years                                                                                                                             | 15            | 44            |
| Fiji              | Fiji - 2010 - Impact Study on Iron Fortified Flour                                                                                                                   | 24-hour recall       | No  |   | Paper questionnaire | Women of childbearing age (15-45 years old)                                                                                                    | 15            | 45            |

|           |                                                                                                                                                                                                                                   |                |     |               |                          |                                                                                                                                 |               |               |
|-----------|-----------------------------------------------------------------------------------------------------------------------------------------------------------------------------------------------------------------------------------|----------------|-----|---------------|--------------------------|---------------------------------------------------------------------------------------------------------------------------------|---------------|---------------|
| Fiji      | Fiji - 2015 - National Nutrition Survey                                                                                                                                                                                           | 24-hour recall | Yes | 2             | Paper questionnaire      | Children between 5-14 years ;Adolescents between 15-17 years;Adults between 18-45 years                                         | 5             | 45            |
| Ghana     | Ghana - 2007 - University of Ghana                                                                                                                                                                                                | 24-hour recall | No  |               | Paper questionnaire      | Non-pregnant non-lactating women having children aged between 2–5years                                                          | 26            | 42            |
| Ghana     | Ghana - 2010/2011 - Modeling the Epidemiologic Transition Study (METS)                                                                                                                                                            | 24-hour recall | Yes | 2             | Paper questionnaire      | Males 25-45 years old;Females 25-45 years old                                                                                   | 25            | 45            |
| Ghana     | Effect of lysine supplementation on health and morbidity in subjects belonging to poor peri-urban households in Accra, Ghana                                                                                                      | 24-hour recall | Yes | 3             | Paper questionnaire      | 1 man 18 to 45 years of age per household.;1 woman 18 to 45 years of age per household;1 child less than 12 years per household | 2             | 45            |
| Ghana     | TenTwenty: Ghana Dietary Intake Among Adolescent Girls in North-Eastern Ghana                                                                                                                                                     | 24-hour recall | Yes | 2             | Paper questionnaire      | Pre- and post-menarche Adolescent girls aged 10-17 years                                                                        | 10            | 17            |
| Ghana     | Community assessment course of the Department of Nutrition and Food Science, University of Ghana                                                                                                                                  | 24-hour recall | No  |               | Paper questionnaire      | 1 man above 18 years of age per household.;Care giver of index child;Index child less than 5 years of age                       | 1             | 64            |
| Guatemala | Guatemala - 2012 - FANTA/INCAP                                                                                                                                                                                                    | 24-hour recall | No  |               | Paper questionnaire      | Children 6-11 months old;Children 12-23 months old;Pregnant women;Lactating women                                               | 0.5           | Not specified |
| Guatemala | Women First Dietary Recall Data: Chimaltenango, Guatemala 2014/2016                                                                                                                                                               | 24-hour recall | Yes | 2             | Paper questionnaire      | 1st trimester pregnant women                                                                                                    | 17            | 33            |
| Guatemala | Validation study (FFQ against R24H)                                                                                                                                                                                               | 24-hour recall | Yes | 3             | Paper questionnaire      | Children 6-11 years old                                                                                                         | 6             | 11            |
| Guatemala | Guatemala - 1996-1999 - Generational Effects Study, INCAP                                                                                                                                                                         | 24-hour recall | Yes | Not specified | Paper questionnaire      | Children <3 years old;Mothers                                                                                                   | Not specified | Not specified |
| Guatemala | Controlling study of the impact of the biofortified bean variety SMN39 (Phaseolus vulgaris L) associated with agricultural and nutritional education, to prevent iron deficiency in rural adolescent women from Eastern Guatemala | 24-hour recall | No  |               | Paper questionnaire      | Adolescent women between 10 to 18 years                                                                                         | 10            | 18            |
| Guatemala | Farm to School: a multicomponent food system intervention to increase consumption of Fruit and Vegetables in Guatemala                                                                                                            | 24-hour recall | Yes | 2             | Electronic questionnaire | Children from 9 to 12 years old                                                                                                 | 8             | 14            |
| Honduras  | Honduras - 2008/2010 - University of North Carolina                                                                                                                                                                               | 24-hour recall | Yes | 12            | Paper questionnaire      | Control children 6–18 months;Children 6–18 months receiving Lipid-based nutrient supplements (LNS)                              | 0.5           | 1.5           |
| India     | India - 2009/2012 - Diet and Nutritional status of Rural population, Prevalence of hypertension and Diabetes among Adults and Infant & Young child feeding practices                                                              | 24-hour recall | No  |               | Paper questionnaire      | Whole population                                                                                                                | 0.5           | 99            |

|           |                                                                                                                                                  |                                                                                                                       |     |   |                     |                                                                                |               |               |
|-----------|--------------------------------------------------------------------------------------------------------------------------------------------------|-----------------------------------------------------------------------------------------------------------------------|-----|---|---------------------|--------------------------------------------------------------------------------|---------------|---------------|
| India     | Women First Dietary Recall Data: Belagavi, Karnataka, India 2014/2016                                                                            | 24-hour recall                                                                                                        | Yes | 2 | Paper questionnaire | 1st trimester pregnant women                                                   | 16            | 33            |
| India     | India - 2013/2014 - All India Institute of Medical Sciences                                                                                      | 24-hour recall                                                                                                        | No  |   | Paper questionnaire | Women 20-60 years old                                                          | 20            | 60            |
| India     | India - 1994/1996 - Pune Maternal Nutrition Study                                                                                                | 24-hour recall                                                                                                        | Yes | 2 | Paper questionnaire | Pregnant women 15-40 years old                                                 | 15            | 40            |
| India     | India - 2013/2014 - Hirabai Cowasji Jehangir Medical Research Institute                                                                          | 24-hour recall                                                                                                        | Yes | 3 | Paper questionnaire | Schoolchildren 2-16 years old                                                  | 2             | 16            |
| India     | India - 2006-2010 - Hirabai Cowasji Jehangir Medical Research Institute                                                                          | 24-hour recall                                                                                                        | Yes | 2 | Paper questionnaire | Girls 2-18 years old                                                           | 2             | 18            |
| India     | SPANDAN Bihar-Odisha Integrated Ag-Nutrition Survey, India, 2014/2015                                                                            | 24-hour recall                                                                                                        | No  |   | Paper questionnaire | Children 5 to 10 years ;Adolescent 11 to 19 years;Population age 20 and above  | 0             | 95            |
| India     | A study of growth, nutrition and health status of urban and rural school children and adolescents with special reference to vitamin D deficiency | 24-hour recall                                                                                                        | Yes | 2 | Paper questionnaire | Children 9 to 18 years                                                         | 9             | 18            |
| India     | Chennai Urban Rural Epidemiological Study (CURES)                                                                                                | 24-hour recall                                                                                                        | Yes | 2 | Paper questionnaire | All men and women greater than or equal to 20 years of age                     | 20            | 70            |
| India     | Developing a national salt reduction program for India: population survey in North and South India                                               | 24-hour recall                                                                                                        | Yes | 2 | Paper questionnaire | Whole population                                                               | 20            | 88            |
| Indonesia | Indonesia - 2011 - SEANUTS                                                                                                                       | 24-hour recall                                                                                                        | No  |   | Paper questionnaire | Children 0.5 - 12 years old                                                    | 0.5           | 12            |
| Indonesia | Food Consumption Survey (FCS) Indonesia 2014                                                                                                     | 24-hour recall                                                                                                        | Yes | 2 | Paper questionnaire | Whole population                                                               | Not specified | Not specified |
| Indonesia | Indonesia - 2003/2004 - The University of Tokyo                                                                                                  | Other: Recall at approximately 9:00, 12:00, 15:00, 18:00, and 20:00 for any foods consumed in the preceding duration. | Yes | 3 | Paper questionnaire | Children/adolescents 2-14 years old                                            | 2             | 14            |
| Indonesia | Indonesia - 2016 - Developing Biomarkers of Exclusive Breastfeeding Practice - HBGD                                                              | Other: 12-h weighed food records combined with 12-h recall                                                            | Yes | 3 | Paper questionnaire | Lactating women                                                                | 15            | 45            |
| Iraq      | Iraq - 1998/2000 - College of Medicine and Health Technology                                                                                     | 24-hour recall                                                                                                        | No  |   | Paper questionnaire | Lactating women 18-38 years old                                                | 18            | 38            |
| Kenya     | Kenya - 2012 - London School of Hygiene/Kenyatta University                                                                                      | 24-hour recall                                                                                                        | No  |   | Paper questionnaire | Children 6-23 months from Kitui County;Children 6-23 months from Vihiga County | 0.5           | 1.9           |
| Kenya     | Kenya National Micronutrient Survey 2011                                                                                                         | 24-hour recall                                                                                                        | Yes | 2 | Paper questionnaire | Preschool children [6-59 months];Women of reproductive age [15-49 years old]   | 0.5           | 49            |

|                                  |                                                                                                                                                                            |                |     |   |                          |                                                                                                                                |               |               |
|----------------------------------|----------------------------------------------------------------------------------------------------------------------------------------------------------------------------|----------------|-----|---|--------------------------|--------------------------------------------------------------------------------------------------------------------------------|---------------|---------------|
| Kenya                            | Kenya - 2012 - Bioversity INULA                                                                                                                                            | 24-hour recall | Yes | 2 | Paper questionnaire      | Children 6-23 months;Mothers/caregivers 16-65 years                                                                            | 0.5           | 65            |
| Kenya                            | Kenya - 2009/2010 - Jomo Kenyatta University of Agriculture and Technology                                                                                                 | 24-hour recall | No  |   | Paper questionnaire      | Children 4-11 years old                                                                                                        | 4             | 11            |
| Kenya                            | Kenya - 2007/2008 - Wageningen University                                                                                                                                  | 24-hour recall | Yes | 3 | Paper questionnaire      | Women of reproductive age having a child aged 2-5 years old                                                                    | 20            | 49            |
| Kenya                            | Kenya - 2001/2002 - University of Bologna                                                                                                                                  | 24-hour recall | No  |   | Paper questionnaire      | Schoolchildren 5-17 years old                                                                                                  | 5             | 17            |
| Kenya                            | Kenya - 1998 - Child Nutrition Project (CNP)                                                                                                                               | 24-hour recall | Yes | 3 | Paper questionnaire      | Schoolchildren                                                                                                                 | 4             | Not specified |
| Kenya                            | Kenya - University of Cape Town                                                                                                                                            | 24-hour recall | Yes | 2 | Paper questionnaire      | Children 24-59 months old                                                                                                      | 2             | 5             |
| Kenya                            | Kenya - 2009 - Washington University School of Medicine                                                                                                                    | 24-hour recall | Yes | 2 | Paper questionnaire      | Children 2-5 years old                                                                                                         | 2             | 5             |
| Kenya                            | Kenya - 2018 - Improving access to and benefits from a wealth of diverse seeds to support on-farm biodiversity for healthy people in resilient landscapes: Baseline Survey | 24-hour recall | Yes | 2 | Paper questionnaire      | Women of reproductive age group (15 -59 years) ;Children aged 6 -49 months                                                     | 0.5           | 49            |
| Kenya                            | Kenya - 2014 - Plenty season - Humid Tropics Agrobiodiversity and Nutrition Project                                                                                        | 24-hour recall | Yes | 2 | Paper questionnaire      | Children aged 12 months - 36 months;Women caregivers of children                                                               | 0.6           | 74            |
| Kenya                            | Kenya - 2015 - Lean Season - Humid Tropics Agrobiodiversity and Nutrition Project                                                                                          | 24-hour recall | Yes | 2 | Paper questionnaire      | Children aged 12 months - 36 months;Women caregivers from households with young children aged 12 - 36 months                   | 0.1           | 71            |
| Kenya                            | Kenya - 2015 - Baseline - Humid Tropics Agrobiodiversity and Nutrition Project                                                                                             | 24-hour recall | Yes | 2 | Paper questionnaire      | Children under 5 years ;Women/caregivers of children under 5 years old                                                         | 0             | 80            |
| Kenya                            | Kenya - 2016: Innovative, participatory tools for dietary assessment and nutrition education in Turkana County – Diagnostic survey                                         | 24-hour recall | Yes | 2 | Paper questionnaire      | Children under 5 years old;Women of reproductive age                                                                           | 0.5           | 52            |
| Kenya                            | Maternal detailed dietary data collected from post-partum women in rural Kenya under the WASH Benefits Clinical Trial                                                      | 24-hour recall | No  |   | Electronic questionnaire | Post-partum women                                                                                                              | Not specified | Not specified |
| Kenya                            | Contribution of locally processed fruits and vegetables towards sustainable nutrition in East Africa: studies from Kenya, Tanzania and Uganda                              | 24-hour recall | Yes | 2 | Electronic questionnaire | Women of reproductive age between 15-49 years except pregnant women                                                            | 15            | 49            |
| Kiribati                         | Kiribati - 1981 - Kiribati Diabetes and Cardiovascular Disease Survey                                                                                                      | 24-hour recall | No  |   | Paper questionnaire      | Adults                                                                                                                         | 20            | Not specified |
| Lao People's Democratic Republic | National Food Consumption Survey Lao PDR 2016-2017                                                                                                                         | 24-hour recall | Yes | 2 | Paper questionnaire      | Infants 3-11 months;Toddlers 12-36 months;Children 3-5.9 years;Adolescents 6-14.9 years;Adults 15-49.9 years;Older adults: ≥50 | 0.3           | 89            |

|                                  |                                                                                            |                                                           |     |   |                     |                                                                                                                 |               |               |
|----------------------------------|--------------------------------------------------------------------------------------------|-----------------------------------------------------------|-----|---|---------------------|-----------------------------------------------------------------------------------------------------------------|---------------|---------------|
|                                  |                                                                                            |                                                           |     |   |                     | years;Pregnant women;Lactating women                                                                            |               |               |
| Lao People's Democratic Republic | Lao's People Democratic Republic - 2005 - Institut Francophone pour la Médecine Tropicale  | 24-hour recall                                            | No  |   | Paper questionnaire | Mothers of children <6 months                                                                                   | Not specified | Not specified |
| Lebanon                          | Early Life Nutrition and Health in Lebanon                                                 | 24-hour recall                                            | No  |   | Paper questionnaire | Children 2-5 years old                                                                                          | 2             | 5             |
| Lebanon                          | Lebanon - 2005/2006 - American University of Beirut                                        | 24-hour recall                                            | Yes | 3 | Paper questionnaire | Adolescents 17-19 years old                                                                                     | 17            | 19            |
| Lebanon                          | Lebanon - 1997/1998 - American University of Beirut                                        | 24-hour recall                                            | No  |   | Paper questionnaire | Non-pregnant women 15-49 years old                                                                              | 15            | 49            |
| Lebanon                          | Lebanon - 1997 - American University of Beirut                                             | 24-hour recall                                            | No  |   | Paper questionnaire | Whole population                                                                                                | 3             | Not specified |
| Lebanon                          | Lebanon - 2003 - American University of Beirut                                             | 24-hour recall                                            | No  |   | Paper questionnaire | Non-pregnant non-lactating women 15-45 years old                                                                | 15            | 45            |
| Lebanon                          | Nutrition and Non-communicable Diseases Risk Factor                                        | 24-hour recall                                            | No  |   | Paper questionnaire | Adults > 18 years old                                                                                           | 18            | Not specified |
| Lebanon                          | Lebanon - 2011/2012 - American University of Beirut                                        | 24-hour recall                                            | Yes | 4 | Paper questionnaire | Children 5-10 years old                                                                                         | 5             | 10            |
| Lebanon                          | Lebanon - 2015 - Saint-Joseph University of Beirut                                         | 24-hour recall                                            | Yes | 2 | Paper questionnaire | Pregnant Lebanese women 18-40 years old                                                                         | 18            | 40            |
| Lesotho                          | Lesotho - 2010 - University of the Free State                                              | Other: Diet history method (24-h recall followed by FFQ). | No  |   | Paper questionnaire | Adolescents aged 16 years old                                                                                   | 16            | 16            |
| Libya                            | Libya - 2008 - Newcastle University                                                        | Estimated food record                                     | Yes | 3 | Paper questionnaire | Schoolchildren aged 12 years old                                                                                | 12            | 12            |
| Libya                            | Libya - 2005/2007 - University of Giessen                                                  | Estimated food record                                     | No  |   | Paper questionnaire | Children 6-9 years old                                                                                          | 6             | 9             |
| Madagascar                       | NutriMad project                                                                           | 24-hour recall                                            | No  |   | Paper questionnaire | Children 0-18 months old                                                                                        | 0             | 1.5           |
| Malawi                           | Malawi - 2010 - DOSE trial                                                                 | 24-hour recall                                            | Yes | 2 | Paper questionnaire | Healthy children aged 15 months                                                                                 | Not specified | Not specified |
| Malawi                           | Malawi - 1998 - University of Otago                                                        | 24-hour recall                                            | No  |   | Paper questionnaire | Children 0 ± 24 months of age                                                                                   | Not specified | 2             |
| Malawi                           | Malawi - 2008 - Lilongwe University of Agriculture & Natural Resources                     | 24-hour recall                                            | No  |   | Paper questionnaire | Children 1-6 years old;Mothers                                                                                  | 1             | Not specified |
| Malaysia                         | Malaysia - 2014 - Ministry of Health Malaysia                                              | 24-hour recall                                            | No  |   | Paper questionnaire | Adults (18-59 years old)                                                                                        | 18            | 59            |
| Malaysia                         | Malaysia Lipid Study 2012/2013                                                             | 24-hour recall                                            | Yes | 3 | Paper questionnaire | Adults 20-67 years old                                                                                          | 20            | 67            |
| Maldives                         | Maldives - 1997/1998 - University of Hohenheim                                             | 24-hour recall                                            | No  |   | Paper questionnaire | Mothers with children 12-59 months that were no longer breastfeeding, 18-48 years old;Children 12-59 months old | 1             | 48            |
| Mali                             | Mali - 2007 - University of Abomey Calavi/Wageningen University/Institute of Rural Economy | 24-hour recall                                            | Yes | 2 | Paper questionnaire | Non-pregnant non-lactating women                                                                                | 15            | 49            |
| Marshall Islands                 | Marshall Islands - 2007 - John Hopkins University                                          | 24-hour recall                                            | Yes | 3 | Paper questionnaire | Children 0-72 months                                                                                            | Not specified | 6             |

|            |                                                                                                                                                                                                                               |                                            |     |               |                          |                                                                                                                                                              |               |               |
|------------|-------------------------------------------------------------------------------------------------------------------------------------------------------------------------------------------------------------------------------|--------------------------------------------|-----|---------------|--------------------------|--------------------------------------------------------------------------------------------------------------------------------------------------------------|---------------|---------------|
| Mexico     | Mexican National Health and Nutrition Survey 2012                                                                                                                                                                             | 24-hour recall                             | Yes | 2             | Electronic questionnaire | Whole population                                                                                                                                             | 0             | 104           |
| Mexico     | Halfway National Health and Nutrition Survey 2016 (ENSANUT MC 2016)                                                                                                                                                           | 24-hour recall                             | Yes | 2             | Electronic questionnaire | Preschool-aged children from 1 to 4 years old;School-aged children from 5 to 11 years old;Adolescents form 12 to 19 years old;Adults from 20 years and older | 1             | 97            |
| Montenegro | European Food Safety Authority programme with the subject “Support to National Dietary Surveys in Compliance with the EU Menu methodology (sixth support) - “The adults’ survey”, including subjects from 10 to 74 years old” | 24-hour recall                             | No  |               | Paper questionnaire      | Adolescents (10-18 years old);Adults (18-65 years old);Elderly (65-74 years old);Pregnant women                                                              | 10            | 74            |
| Mozambique | Estudo do Estado Nutricional e da Dieta em Raparigas Adolescentes na Zambézia (ZANE)                                                                                                                                          | 24-hour recall                             | Yes | 4             | Paper questionnaire      | Women 14-19 years old                                                                                                                                        | 14            | 19            |
| Mozambique | Mozambique - 2006 - HarvestPlus                                                                                                                                                                                               | 24-hour recall                             | Yes | 2             | Paper questionnaire      | Children 6-36 months years old;Mothers 15-49 years old (non-pregnant non-lactating; pregnant; lactating; pregnant and lactating women)                       | 0.5           | 49            |
| Mozambique | Towards Sustainable Nutrition Improvement in Rural Mozambique (TSNI) - Baseline survey                                                                                                                                        | 24-hour recall                             | No  |               | Paper questionnaire      | Children 6-38 months old                                                                                                                                     | 0.5           | 3             |
| Myanmar    | Myanmar - 2003/2005 - Department of Medical Research (Lower Myanmar)                                                                                                                                                          | Other: Combined food diary and 24-h recall | Yes | 3             | Paper questionnaire      | Whole population                                                                                                                                             | 2             | 93            |
| Nepal      | Nepal - 2008/2009 - University of Bergen                                                                                                                                                                                      | 24-hour recall                             | Yes | 3             | Paper questionnaire      | Pregnant women                                                                                                                                               | 17            | 44            |
| Nepal      | Nepal - 1989 - Mukogawa Women’s University                                                                                                                                                                                    | 24-hour recall                             | No  |               | Paper questionnaire      | Nepaleses 10-68 years old                                                                                                                                    | 10            | 68            |
| Nepal      | Nepal - 2000/2001 - University of Bergen                                                                                                                                                                                      | 24-hour recall                             | Yes | 2             | Paper questionnaire      | Non-pregnant women 13-35 years old                                                                                                                           | 13            | 35            |
| Niger      | Niger - 2019 - Republique du Niger, Institut National de la Statistique Niger, HC3N                                                                                                                                           | 24-hour recall                             | Yes | Not specified | Paper questionnaire      | Children 6-23 months old;Children 24-59 months old;Adolescent boys 10-18 years old;Adolescent girls 10-18 years old;Women 19-49 years old                    | Not specified | Not specified |
| Nigeria    | Nigeria - 1995 - Federal University of Agriculture, Abeokuta                                                                                                                                                                  | 24-hour recall                             | Yes | 3             | Paper questionnaire      | Market women                                                                                                                                                 | 19            | 66            |
| Nigeria    | Nigeria - Federal University of Agriculture, Abeokuta                                                                                                                                                                         | 24-hour recall                             | Yes | 3             | Paper questionnaire      | Adolescents 10-19 years old                                                                                                                                  | 10            | 19            |
| Nigeria    | Nigeria - 2011 - HarvestPlus                                                                                                                                                                                                  | 24-hour recall                             | Yes | 2             | Paper questionnaire      | Women of childbearing age 18–49 years old ;Children 6–59 months of age                                                                                       | 0.5           | 49            |
| Nigeria    | Nigeria - 2007 - Ambrose Alli University                                                                                                                                                                                      | 24-hour recall                             | No  |               | Paper questionnaire      | Primary school children aged 7-12 years                                                                                                                      | 7             | 12            |

|                  |                                                                                                                                   |                |     |               |                          |                                                                                                 |     |               |
|------------------|-----------------------------------------------------------------------------------------------------------------------------------|----------------|-----|---------------|--------------------------|-------------------------------------------------------------------------------------------------|-----|---------------|
| Nigeria          | Nigeria - 2001/2003 - International Institute of Tropical Agriculture                                                             | 24-hour recall | No  |               | Paper questionnaire      | Children 2-5 years old                                                                          | 2   | 5             |
| Nigeria          | Food consumption and nutritional status of health workers in Ogun state                                                           | 24-hour recall | Yes | 2             | Paper questionnaire      | Health workers                                                                                  | 18  | 60            |
| Nigeria          | Nigeria - 2021 - National Food Consumption and Nutrition Survey                                                                   | 24-hour recall | Yes | Not specified | Electronic questionnaire | Women of reproductive age (15-49 years old);Children (6-23 months old);Children (2-5 years old) | 2   | 49            |
| Pakistan         | Women First Dietary Recall Data: Thatta, Pakistan 2014/2016                                                                       | 24-hour recall | Yes | 2             | Paper questionnaire      | 1st trimester pregnant women                                                                    | 16  | 35            |
| Pakistan         | Pakistan - 2008/2009 - University of Tübingen                                                                                     | 24-hour recall | Yes | 3             | Paper questionnaire      | Healthy elderly men                                                                             | 50  | 98            |
| Pakistan         | Study of Environmental Enteropathy and Malnutrition in Pakistan (SEEM-Pakistan) Protocol                                          | 24-hour recall | Yes | 20            | Paper questionnaire      | Infant children 0 to 1 year                                                                     | 0   | 1             |
| Pakistan         | ADOLESCENT HEALTH, NUTRITION AND WELL-BEING SURVEY IN TANDO MUHAMMAD KHAN (TMK) DISTRICT, SINDH                                   | 24-hour recall | No  |               | Paper questionnaire      | Adolescents age limit 10-19 years female;Adolescents age limit 10-19 years male                 | 10  | 19            |
| Panama           | Panama - 2003 - ProPAN                                                                                                            | 24-hour recall | Yes | 2             | Paper questionnaire      | Children 6-23 months old                                                                        | 0.5 | 2             |
| Panama           | Panama - 2009 - ProPAN                                                                                                            | 24-hour recall | Yes | 2             | Paper questionnaire      | Children 6-24 months                                                                            | 0.5 | 2             |
| Papua New Guinea | Papua New Guinea - 2010/2011 - National institute of Health and Nutrition, Tokyo                                                  | 24-hour recall | No  |               | Paper questionnaire      | Children 6-59 months old;Mothers                                                                | 0.5 | Not specified |
| Peru             | Peru - 2004/2005 - National Survey on Nutritional, Biochemical, Socioeconomic Indicators Related to Chronic Degenerative Diseases | 24-hour recall | Yes | 2             | Paper questionnaire      | Men and women > 20 years old                                                                    | 20  | Not specified |
| Peru             | Peru - 2003 - National Food Consumption Survey for Fertile Women and 12 to 35 Month Old Children                                  | 24-hour recall | No  |               | Paper questionnaire      | Women of reproductive age 15-49 years;Children 12-35 months old                                 | 1   | 49            |
| Peru             | Peru - 2015 - Latin American Study of Nutrition and Health / Estudio Latinoamericano de Nutrición y Salud (ELANS)                 | 24-hour recall | Yes | 2             | Paper questionnaire      | Adults 15-65 years old                                                                          | 15  | 65            |
| Peru             | Vigilancia Alimentaria y Nutricional por etapas de vida – VIANEV - niños menores de 36 meses - 2015                               | 24-hour recall | Yes | 2             | Paper questionnaire      | Niños menores de 36 meses                                                                       | 0   | 2             |
| Philippines      | 6th Philippines National Nutrition Survey (NNS) - 2003 - Dietary component (lactating women) - DOST-FNRI                          | 24-hour recall | Yes | 2             | Paper questionnaire      | Lactating women                                                                                 | 15  | 47            |
| Philippines      | 8th Philippines National Nutrition Survey (NNS) - 2013 - Dietary component - DOST-FNRI                                            | 24-hour recall | Yes | 2             | Paper questionnaire      | Whole population                                                                                | 0.5 | 101           |
| Philippines      | 7th Philippines National Nutrition Survey (NNS) - 2008 - Dietary component - DOST-FNRI                                            | 24-hour recall | Yes | 2             | Paper questionnaire      | Whole population                                                                                | 0.5 | 110           |

|                    |                                                                                                                                                                                                     |                       |     |               |                     |                                                                                                                                                                            |               |               |
|--------------------|-----------------------------------------------------------------------------------------------------------------------------------------------------------------------------------------------------|-----------------------|-----|---------------|---------------------|----------------------------------------------------------------------------------------------------------------------------------------------------------------------------|---------------|---------------|
| Philippines        | Philippines - 2002 - Cebu Longitudinal Health and Nutrition Survey (CLHNS) <sup>1</sup>                                                                                                             | 24-hour recall        | Yes | 2             | Paper questionnaire | Children enrolled at Baseline born between May 1, 1983- April 30, 1984 (birth cohort), which are already adults;Mothers of children enrolled at Baseline                   | 25            | 58            |
| Philippines        | Philippines - 1994 - Cebu Longitudinal Health and Nutrition Survey (CLHNS) <sup>1</sup>                                                                                                             | 24-hour recall        | No  |               | Paper questionnaire | Children enrolled at Baseline born between May 1, 1983- April 30, 1984 (birth cohort), including their twins or younger sibling. ;Mothers of children enrolled at Baseline | 10            | 47            |
| Philippines        | Philippines - 1998 - Cebu Longitudinal Health and Nutrition Survey (CLHNS) <sup>1</sup>                                                                                                             | 24-hour recall        | Yes | 2             | Paper questionnaire | Children enrolled at Baseline born between May 1, 1983- April 30, 1984 (birth cohort);Mothers of children enrolled at Baseline                                             | 14            | 55            |
| Philippines        | Philippines - 2012 - Cebu Longitudinal Health and Nutrition Survey (CLHNS) <sup>1</sup>                                                                                                             | 24-hour recall        | Yes | 2             | Paper questionnaire | Adult women                                                                                                                                                                | 43            | 75            |
| Philippines        | Philippines - 2015 - Cebu Longitudinal Health and Nutrition Survey (CLHNS) <sup>1</sup>                                                                                                             | 24-hour recall        | Yes | 2             | Paper questionnaire | Mothers enrolled at Baseline                                                                                                                                               | 45            | 78            |
| Philippines        | Philippines - 1983 - 1986 - Cebu Longitudinal Health and Nutrition Survey (CLHNS) <sup>1</sup>                                                                                                      | 24-hour recall        | Yes | Not specified | Paper questionnaire | Children enrolled at Baseline born between May 1, 1983- April 30, 1984 (birth cohort);Mothers of children enrolled at Baseline                                             | 0             | 48            |
| Philippines        | Philippines - 2005 - Cebu Longitudinal Health and Nutrition Survey (CLHNS) <sup>1</sup>                                                                                                             | 24-hour recall        | Yes | 2             | Paper questionnaire | Children enrolled at Baseline born between May 1, 1983- April 30, 1984 (birth cohort), which are already adults;Mothers of children enrolled at Baseline                   | 21            | 62            |
| Romania            | Romania - 2012 - DIETA PILOT Adults Study                                                                                                                                                           | Estimated food record | Yes | 7             | Paper questionnaire | Adults 19-92 years old                                                                                                                                                     | 19            | 92            |
| Romania            | Romania - 2012 - DIETA PILOT Children Study                                                                                                                                                         | 24-hour recall        | No  |               | Paper questionnaire | Children                                                                                                                                                                   | 3             | 18            |
| Russian Federation | Russian Federation - 1995/2014 - Russian Longitudinal Monitoring Survey (Phase II)                                                                                                                  | 24-hour recall        | No  |               | Paper questionnaire | Whole population                                                                                                                                                           | Not specified | Not specified |
| Russian Federation | Russian Federation - 2001 - The State Research Center for Preventive Medicine of the Ministry of Health of the Russian Federation/Institute of Nutrition of the Russian Academy of Medical Sciences | 24-hour recall        | No  |               | Paper questionnaire | Women non-pregnant non-lactating                                                                                                                                           | 19            | 64            |
| Russian Federation | Russian Federation - 2006 - Institute of Nutrition, Russian Academy of Medical Sciences (RAMS)                                                                                                      | 24-hour recall        | Yes | 2             | Paper questionnaire | Children 2-24 months old                                                                                                                                                   | 0.2           | 2             |
| Russian Federation | Russian Federation - Saratov State Medical University                                                                                                                                               | 24-hour recall        | No  |               | Paper questionnaire | Schoolchildren 7-14 years old;Adolescents 15-17 years old                                                                                                                  | 7             | 17            |

<sup>1</sup> The Philippines CEBU surveys were considered as one longitudinal survey in the Results Section.

|                       |                                                                                                               |                                                                                                                                                                                                                   |     |               |                          |                                                                                   |               |               |
|-----------------------|---------------------------------------------------------------------------------------------------------------|-------------------------------------------------------------------------------------------------------------------------------------------------------------------------------------------------------------------|-----|---------------|--------------------------|-----------------------------------------------------------------------------------|---------------|---------------|
| Russian Federation    | Russian Federation - 1992/1994 - Russian Longitudinal Monitoring Survey (Phase I)                             | 24-hour recall                                                                                                                                                                                                    | No  |               | Electronic questionnaire | Whole population                                                                  | Not specified | Not specified |
| Rwanda                | Rwanda - 2010/2011 - Food and Nutrition Survey                                                                | 24-hour recall                                                                                                                                                                                                    | Yes | 2             | Paper questionnaire      | Women 15-44 years;Children 6-59 months                                            | 0.5           | 44            |
| Samoa                 | Samoa - 1990 - Hawaii Department of Health                                                                    | 24-hour recall                                                                                                                                                                                                    | No  |               | Paper questionnaire      | Adults 25 to 55 years                                                             | 25            | 55            |
| Sao Tome and Principe | Nutritional adequacy in undernourished children from 6 to 59 months of age, in Cantagalo, São Tomé e Príncipe | 24-hour recall                                                                                                                                                                                                    | No  |               | Paper questionnaire      | Children from 6 to 59 months of age                                               | 0.5           | 5             |
| Serbia                | Serbia - 2014/2015 - University of Belgrade                                                                   | 24-hour recall                                                                                                                                                                                                    | Yes | 3             | Paper questionnaire      | Healthy women aged 18-49 years old                                                | 18            | 49            |
| Serbia                | Kosovo - 2010/2011 - University of Kassel                                                                     | Other: Weighted dietary record for the food eaten in the kindergarten; estimated food record form and a combined 24-h recall and dietary history form completed by parents with data on food consumption at home. | Yes | 3             | Paper questionnaire      | Children 12-83 months that were registered and attended the selected kindergarten | 1             | 7             |
| Solomon Islands       | Solomon Islands - 2005 - University of California                                                             | 24-hour recall                                                                                                                                                                                                    | Yes | Not specified | Paper questionnaire      | Adults > 15 years old                                                             | 15            | Not specified |
| South Africa          | South Africa - 1999 - National Food Consumption Survey (NFCS)                                                 | 24-hour recall                                                                                                                                                                                                    | No  |               | Paper questionnaire      | Children 1-9 years old                                                            | 1             | 9             |
| Sri Lanka             | Sri Lanka - 2006 - University of Colombo                                                                      | 24-hour recall                                                                                                                                                                                                    | No  |               | Paper questionnaire      | Healthy adults ≥18 years old                                                      | 18            | Not specified |
| Sri Lanka             | Dietary Intakes of Sri Lankan Children 6-14 years                                                             | 24-hour recall                                                                                                                                                                                                    | No  |               | Paper questionnaire      | Children aged 6-14y                                                               | 6             | 14            |
| Sudan                 | Sudan - 2006 - London Metropolitan University                                                                 | 24-hour recall                                                                                                                                                                                                    | No  |               | Paper questionnaire      | Healthy non-pregnant, pregnant and lactating women 18-42 years                    | 18            | 42            |
| Tajikistan            | Tajikistan - 2000/2005 - Kazakh Academy of Nutrition                                                          | 24-hour recall                                                                                                                                                                                                    | Yes | 2             | Paper questionnaire      | Mothers-singletons 18-45 years                                                    | 18            | 45            |
| Thailand              | Thailand - 2011 - SEANUTS                                                                                     | 24-hour recall                                                                                                                                                                                                    | No  |               | Electronic questionnaire | Children 0.5-12 years old                                                         | 0.5           | 12            |
| Thailand              | Thailand - 2008/2009 - Bureau of Nutrition, Department of Health, Ministry of Public Health                   | 24-hour recall                                                                                                                                                                                                    | No  |               | Paper questionnaire      | Whole population                                                                  | 1             | Not specified |
| Tunisia               | Tunisia - 2011 - National Institute of Public Health                                                          | Weighted food record                                                                                                                                                                                              | Yes | 7             | Paper questionnaire      | Healthy women;Obese women                                                         | 29            | 50            |
| Tunisia               | Understanding the Nutritional Transition in the Maghreb to Contribute                                         | Estimated food record                                                                                                                                                                                             | Yes | 3             | Paper questionnaire      | Adolescent [10-20y[: Male;Adolescent [10-20y[:                                    | 10            | 49            |

|                                    |                                                                                                                                               |                       |     |   |                          |                                                                                                                                                                                                                                                                                                                                                                          |               |               |
|------------------------------------|-----------------------------------------------------------------------------------------------------------------------------------------------|-----------------------|-----|---|--------------------------|--------------------------------------------------------------------------------------------------------------------------------------------------------------------------------------------------------------------------------------------------------------------------------------------------------------------------------------------------------------------------|---------------|---------------|
|                                    | to the Prevention of Obesity and Non-communicable Diseases. 2009-2010                                                                         |                       |     |   |                          | Female;Adult [20-50y[: Male;Adult [20-50y[: Female                                                                                                                                                                                                                                                                                                                       |               |               |
| Tunisia                            | Tunisian National Nutrition Survey 1996-1997: Assessment of the nutritional status of the Tunisian population                                 | Estimated food record | Yes | 3 | Paper questionnaire      | Children [2-6y[: Male;Children [2-6y[: Female;Children [6-10y[: Male;Children [6-10y[: Female;Adolescent [10-20y[: Male;Adolescent [10-20y[: Female;Adolescent [10-20y[: Pregnant;Adolescent [10-20y[: Lactating;Adult [20-60y[: Male;Adult [20-60y[: Female;Adult [20-60y[: Pregnant;Adult [20-60y[:Lactating;Adults aged over 60 y: Male;Adults aged over 60 y: Female | 2             | 75            |
| Uganda                             | HarvestPlus Reaching End Users (REU) Orange-Fleshed Sweet Potato (OFSP) Project                                                               | 24-hour recall        | Yes | 2 | Paper questionnaire      | Women of reproductive age                                                                                                                                                                                                                                                                                                                                                | 13            | 82            |
| Uganda                             | The 2008 Uganda Food Consumption Survey                                                                                                       | 24-hour recall        | Yes | 2 | Paper questionnaire      | Women 15-49 years-old;Women with children 24-59 months;Women with children 6-23 months old                                                                                                                                                                                                                                                                               | 0.5           | 59            |
| Uganda                             | Uganda - 2006 - Makerere University                                                                                                           | 24-hour recall        | Yes | 3 | Paper questionnaire      | Adolescents girls (11-14 years old)                                                                                                                                                                                                                                                                                                                                      | 11            | 14            |
| Uganda                             | Contribution of locally processed fruits and vegetables towards sustainable nutrition in East Africa: studies from Kenya, Tanzania and Uganda | 24-hour recall        | Yes | 2 | Electronic questionnaire | Women of reproductive age between 15-49 years except pregnant women                                                                                                                                                                                                                                                                                                      | 15            | 49            |
| Ukraine                            | Ukraine - 2012/2013 - State Research Center for Food Hygiene, Ministry of Health                                                              | 24-hour recall        | No  |   | Paper questionnaire      | Adults 25-65 years                                                                                                                                                                                                                                                                                                                                                       | 25            | 65            |
| United Republic of Tanzania        | United Republic of Tanzania - 2013 - Ghent University                                                                                         | 24-hour recall        | No  |   | Paper questionnaire      | Children 0-11 months old                                                                                                                                                                                                                                                                                                                                                 | Not specified | 1             |
| United Republic of Tanzania        | Scale-N Nutrition Survey 2016                                                                                                                 | 24-hour recall        | No  |   | Paper questionnaire      | Mothers/caregivers;Children                                                                                                                                                                                                                                                                                                                                              | 5             | 75            |
| United Republic of Tanzania        | Tanzania - 2009 - McGill University                                                                                                           | 24-hour recall        | Yes | 2 | Paper questionnaire      | Mothers;Children 2-5 years                                                                                                                                                                                                                                                                                                                                               | 2             | Not specified |
| United Republic of Tanzania        | Contribution of locally processed fruits and vegetables towards sustainable nutrition in East Africa: studies from Kenya, Tanzania and Uganda | 24-hour recall        | Yes | 2 | Electronic questionnaire | Women of reproductive age between 15-49 years except pregnant women                                                                                                                                                                                                                                                                                                      | 15            | 49            |
| Vanuatu                            | Vanuatu - 1985 - South Pacific Commission/WHO                                                                                                 | 24-hour recall        | No  |   | Paper questionnaire      | Pregnant or lactating women;Males                                                                                                                                                                                                                                                                                                                                        | 20            | Not specified |
| Venezuela (Bolivarian Republic of) | Venezuela - 2015 - Latin American Study of Nutrition and Health / Estudio Latinoamericano de Nutrición y Salud (ELANS)                        | 24-hour recall        | Yes | 2 | Paper questionnaire      | Adults 15-65 years old                                                                                                                                                                                                                                                                                                                                                   | 15            | 65            |

|                                    |                                                                                                                                |                |     |               |                          |                                                                                                        |               |               |
|------------------------------------|--------------------------------------------------------------------------------------------------------------------------------|----------------|-----|---------------|--------------------------|--------------------------------------------------------------------------------------------------------|---------------|---------------|
| Venezuela (Bolivarian Republic of) | Venezuela - 1999/2000 - Centro de Atención Nutricional Infantil Antimano                                                       | 24-hour recall | No  |               | Paper questionnaire      | Health children < 10 years;Children < 10 years with mild malnutrition                                  | Not specified | 10            |
| Venezuela (Bolivarian Republic of) | Venezuela - 2002 - CEINUT, Universidad de Carabobo                                                                             | 24-hour recall | No  |               | Paper questionnaire      | Children 4-7 years old                                                                                 | 4             | 7             |
| Venezuela (Bolivarian Republic of) | Venezuela - 1998/1999 - CEINUT, Universidad de Carabobo                                                                        | 24-hour recall | Yes | 3             | Paper questionnaire      | Children 4-14 years old                                                                                | 4             | 14            |
| Venezuela (Bolivarian Republic of) | Venezuela - 2013 - Encuesta Nacional de Consumo de Alimentos (ENCA)                                                            | 24-hour recall | No  |               | Paper questionnaire      | General population above 3 years old                                                                   | 3             | Not specified |
| Vietnam                            | Vietnam - 2014 - Bioversity                                                                                                    | 24-hour recall | Yes | 2             | Paper questionnaire      | Women of reproductive age                                                                              | 15            | 59            |
| Vietnam                            | Vietnam - 2011 - SEANUTS                                                                                                       | 24-hour recall | No  |               | Paper questionnaire      | Children 0.5-11 years old                                                                              | 0.5           | 11            |
| Vietnam                            | Vietnam - Japan Women's University                                                                                             | 24-hour recall | Yes | 3             | Paper questionnaire      | Women 30-39 years old                                                                                  | 30            | 39            |
| Vietnam                            | Vietnam - 2006 - Institute of Tropical Medicine, Antwerp                                                                       | 24-hour recall | No  |               | Paper questionnaire      | Adolescents                                                                                            | 15            | 17            |
| Vietnam                            | Vietnam - 1999 - Japan Women's University                                                                                      | 24-hour recall | Yes | 3             | Paper questionnaire      | Primary school girls 7-9 years old                                                                     | 7             | 9             |
| Vietnam                            | South East Asian Nutrition Survey II (SEANUTS II) in Vietnam: Nutrition survey of Vietnamese children aged 0.5 to 11 years old | 24-hour recall | No  |               | Paper questionnaire      | Children aged from 0.5 to 11 years old                                                                 | 0.5           | 11            |
| Vietnam                            | Vietnam 2019 General Nutrition Survey                                                                                          | 24-hour recall | Yes | Not specified | Electronic questionnaire | Not specified                                                                                          | 15            | 49            |
| West Bank and Gaza Strip           | West Bank and Gaza Strip - 2002 - Al-Quds University/Johns Hopkins Bloomberg School of Public Health                           | 24-hour recall | No  |               | Paper questionnaire      | Children 13-59 months old;Non-pregnant mothers 15-49 years old                                         | 1             | 49            |
| West Bank and Gaza Strip           | West Bank and Gaza Strip - 2003 - Al-Quds University/Johns Hopkins Bloomberg School of Public Health                           | 24-hour recall | No  |               | Paper questionnaire      | Children 12-59 months old                                                                              | 1             | 5             |
| Zambia                             | Zambia - 2008 - Zambian National Food and Nutrition Commission                                                                 | 24-hour recall | Yes | 2             | Paper questionnaire      | Women in reproductive age (15-49 years);Children 6-59 months                                           | 0.5           | 49            |
| Zambia                             | The 2009 Food consumption and Vitamin A status survey in Zambia                                                                | 24-hour recall | Yes | 2             | Paper questionnaire      | Children 2-5 years;Children 6-24 months;Women of child-bearing age 16-70 years old                     | 0.1           | 70            |
| Zambia                             | Zambia - 2012/2013 - Johns Hopkins University                                                                                  | 24-hour recall | Yes | 7             | Electronic questionnaire | Children 4-8 years not yet enrolled in school                                                          | 4             | 8             |
| Zambia                             | Zambia - 2012 - University of Wisconsin                                                                                        | 24-hour recall | Yes | 9             | Paper questionnaire      | Children 57-88 months not enrolled in school.                                                          | 4.7           | 7.3           |
| Zambia                             | Minimum Dietary Diversity validation study using weighed food records among women of reproductive age in rural Zambia          | 24-hour recall | No  |               | Paper questionnaire      | Mothers of children aged 6-59 months                                                                   | Not specified | Not specified |
| Zambia                             | Zambia Food Consumption and Nutrition Survey 2012                                                                              | 24-hour recall | Yes | 2             | Paper questionnaire      | children 6-59 months;women 15-49 years                                                                 | 0.5           | 49            |
| Zambia                             | Zambia Food Consumption and Micronutrient Survey for 2020                                                                      | 24-hour recall | Yes | 3             | Paper questionnaire      | Children 6-59 months (6-23 months and 24-59 months);Adolescent girls 10-14 years;Women of reproductive | 0             | 49            |

|          |                                       |                |     |               |                     |                                                          |    |    |
|----------|---------------------------------------|----------------|-----|---------------|---------------------|----------------------------------------------------------|----|----|
|          |                                       |                |     |               |                     | age 15-49 years (including pregnant and lactating women) |    |    |
| Zimbabwe | Zimbabwe - 2003 - McMaster University | 24-hour recall | Yes | Not specified | Paper questionnaire | Adults                                                   | 34 | 93 |
